# Supplementary material for: Fat mass prediction equations and reference ranges for Saudi Arabian Children aged 8–12 years using machine technique method
Source: PeerJ. 2021 Feb 23;9:e10734. doi: 10.7717/peerj.10734 (PMC7908871; doi:10.7717/peerj.10734)
Supplement: Supplemental Information 1 [file peerj-09-10734-s001.xlsx]

## Sheet: Sheet1
no	Age	Weight	Height	Fat%	fat%_predicted	BMI	WC	Gender	Category	true_fat_mass	predicted_fat_mass	true_FMI	predicted_FMI	FMI_DIFF	FMI_RMSE
1	10	53.1	138	39.7	36.4802	27.9	82	1	4	21.0807	19.371	11.0695	10.1717	0.897757	0.626518
2	11	36.6	149	16.1	17.7749	16.5	66	1	2	5.8926	6.50561	2.6542	2.93032	-0.276118
3	8	27.5	126	21.5	22.9501	17.3	60	1	2	5.9125	6.31127	3.72417	3.97536	-0.25118
4	9	33.1	133	22.9	25.119	18.7	65	1	2	7.5799	8.3144	4.28509	4.70032	-0.415231
5	11	40	153	19.7	21.0894	17.1	65	1	2	7.88	8.43575	3.36623	3.60364	-0.237411
8	10	42.2	134	33.5	33.6541	23.5	81	1	4	14.137	14.202	7.87313	7.90935	-0.0362196
9	11	32.8	140	18.2	19.6614	16.7	57	1	2	5.9696	6.44894	3.04571	3.29028	-0.244562
10	9	23.5	122	21	18.844	15.8	55	1	2	4.935	4.42835	3.31564	2.97524	0.340402
11	11	57.3	148	37	35.434	26.2	88	1	4	21.201	20.3037	9.67905	9.2694	0.409656
12	9	24.5	130	19.6	16.1692	14.5	60	1	2	4.802	3.96144	2.84142	2.34405	0.49737
13	8	23.7	130	14.2	13.5723	14	52	1	2	3.3654	3.21663	1.99136	1.90333	0.0880285
14	10	29.8	135	21.7	19.6356	16.4	62	1	2	6.4666	5.85141	3.5482	3.21065	0.337555
15	11	23.2	122	16.3	17.3204	15.6	56	1	2	3.7816	4.01832	2.54071	2.69976	-0.159045
16	8	45.8	143	32.7	32.9208	22.4	77	1	4	14.9766	15.0777	7.32388	7.37334	-0.0494578
17	10	23.9	120	20.3	19.6356	16.6	53	1	2	4.8517	4.69291	3.36924	3.25896	0.110274
18	9	27.5	132	13.3	18.844	15.8	59	1	2	3.6575	5.18211	2.09912	2.97412	-0.875004
19	8	23.7	121	15.7	18.844	16.2	52	1	2	3.7209	4.46603	2.54142	3.05036	-0.508936
21	11	32.8	134	22.1	24.1838	18.3	68	1	2	7.2488	7.9323	4.03698	4.41763	-0.38065
22	8	21.8	120	19.3	16.6585	15.1	51	1	2	4.2074	3.63155	2.92181	2.52191	0.399899
23	9	24.8	127	17.4	16.6585	15.4	59	1	2	4.3152	4.1313	2.67543	2.56141	0.114019
24	10	23.2	125	14.4	15.53	14.8	59	1	2	3.3408	3.60297	2.13811	2.3059	-0.167786
25	11	91.8	161	49.3	41.8581	35.4	104	1	4	45.2574	38.4257	17.4597	14.8242	2.63558
26	9	41.2	130	35.4	35.1919	24.4	72	1	4	14.5848	14.4991	8.63006	8.57933	0.0507301
27	9	23.7	130	7.4	13.5723	14	55	1	2	1.7538	3.21663	1.03775	1.90333	-0.865581
29	8	38.5	123	38.9	35.8058	25.4	71	1	4	14.9765	13.7852	9.8992	9.11179	0.787412
30	10	75.5	150	46.6	41.8581	33.6	103	1	4	35.183	31.6028	15.6369	14.0457	1.59118
32	8	37.9	129	34.1	32.9208	22.8	77	1	4	12.9239	12.477	7.7663	7.49774	0.268559
33	10	36.7	151	18.5	17.6089	16.1	67	1	2	6.7895	6.46246	2.97772	2.83429	0.14343
34	8	20.2	112	19.1	18.844	16.1	56	1	2	3.8582	3.80649	3.07573	3.03451	0.0412206
35	10	24.1	128	18.3	15.53	14.7	60	1	2	4.4103	3.74274	2.69183	2.28438	0.407449
39	8	42.2	131	36.6	35.1919	24.6	77	1	4	15.4452	14.851	9.00017	8.65392	0.346259
40	10	24.4	131	13.7	14.8892	14.2	59	1	2	3.3428	3.63298	1.94791	2.117	-0.16909
41	10	30.8	128	26.4	25.4046	18.8	70	1	2	8.1312	7.82463	4.96289	4.77578	0.187115
42	8	31.2	117	34.6	32.9208	22.8	72	1	4	10.7952	10.2713	7.88604	7.50332	0.382719
43	9	37.7	141	24.7	26.5488	19	72	1	2	9.3119	10.0089	4.68382	5.03441	-0.350588
44	11	47	152	25	27.7377	20.3	74	1	2	11.75	13.0367	5.0857	5.64263	-0.556934
45	11	40.3	156	15.2	17.7926	16.6	64	1	2	6.1256	7.17041	2.51709	2.94642	-0.429326
46	10	33.3	133	22.1	24.765	18.8	63	1	2	7.3593	8.24673	4.16038	4.66207	-0.501685
48	10	44.6	143	29.7	30.7776	21.8	73	1	2	13.2462	13.7268	6.47768	6.71271	-0.235031
50	9	26.1	132	18	16.6585	15	64	1	2	4.698	4.34786	2.69628	2.49533	0.200953
52	11	41.3	148	24.8	26.1771	18.9	72	1	2	10.2424	10.8111	4.67604	4.93568	-0.259643
53	8	50	143	36	35.1919	24.5	77	1	4	18	17.596	8.80239	8.6048	0.197587
54	8	32.8	122	33	32.9208	22	69	1	4	10.824	10.798	7.27224	7.25479	0.0174486
55	8	23	117	21.8	20.8789	16.8	57	1	2	5.014	4.80214	3.66279	3.50803	0.15477
56	9	47.9	134	38.9	36.1376	26.7	76	1	4	18.6331	17.3099	10.3771	9.64018	0.736908
57	9	35.4	137	25.7	26.548	18.9	65	1	2	9.0978	9.39798	4.84725	5.00718	-0.159935
58	8	27.4	129	24.3	19.6356	16.6	64	1	2	6.6582	5.38015	4.00108	3.23307	0.768012
59	9	29.7	136	16.7	17.9583	16.1	58	1	2	4.9599	5.33361	2.68161	2.88366	-0.202051
60	10	60.7	145	41.4	37.4532	28.9	93	1	4	25.1298	22.7341	11.9523	10.8129	1.13945
61	11	60.7	144	41	37.4532	29.3	86	1	4	24.887	22.7341	12.0018	10.9636	1.03824
62	10	42.4	147	26	28.1095	19.6	71	1	2	11.024	11.9184	5.10158	5.51549	-0.413916
63	8	40.7	129	35.2	35.1919	24.5	74	1	4	14.3264	14.3231	8.6091	8.60712	0.00197914
64	8	23.2	121	16.6	18.844	15.8	57	1	2	3.8512	4.37181	2.63042	2.98601	-0.355586
65	10	28	129	19.9	20.8789	16.8	60	1	2	5.572	5.84608	3.34836	3.51306	-0.1647
67	10	31.5	141	18.6	17.6266	15.8	63	1	2	5.859	5.55237	2.94703	2.7928	0.154231
68	9	40.7	155	17.1	19.0181	16.9	67	1	2	6.9597	7.74039	2.89686	3.22181	-0.324948
69	10	57.5	148	37.5	35.7658	26.3	86	1	4	21.5625	20.5654	9.84409	9.38886	0.455235
70	9	23.5	125	15.8	16.6585	15	60	1	2	3.713	3.91474	2.37632	2.50543	-0.129113
71	8	18.7	115	14.9	13.5723	14.1	56	1	2	2.7863	2.53802	2.10684	1.91911	0.187737
72	8	27.5	128	19.4	20.8789	16.8	61	1	2	5.335	5.74168	3.25623	3.50445	-0.24822
74	8	23.7	121	17.8	21.2575	17.8	55	1	2	4.2186	5.03804	2.88136	3.44105	-0.559686
75	8	20	117	12.5	14.8522	14.6	54	1	2	2.5	2.97044	1.82628	2.16995	-0.343663
76	8	22.3	116	19.7	19.6356	16.6	54	1	2	4.3931	4.37874	3.26479	3.25411	0.0106745
77	11	62.6	155	35.2	35.434	26.1	81	1	4	22.0352	22.1817	9.17178	9.23275	-0.0609753
78	8	23.7	128	15.8	14.8522	14.5	56	1	2	3.7446	3.51997	2.28552	2.14842	0.137102
79	8	22.7	124	18.1	15.53	14.8	55	1	2	4.1087	3.52532	2.67215	2.29274	0.379412
81	10	40.6	147	23.8	23.7986	18.8	47	1	2	9.6628	9.66222	4.47166	4.47139	0.000267548
82	8	49.2	138	38.8	35.8058	25.8	74	1	4	19.0896	17.6164	10.0239	9.25039	0.773555
83	8	56.1	138	43.7	37.4532	29.5	84	1	4	24.5157	21.0113	12.8732	11.033	1.84018
85	9	38.1	128	34.3	33.6541	23.3	70	1	4	13.0683	12.8222	7.97626	7.82606	0.150197
86	11	42.1	144	26	28.1095	20.3	71	1	2	10.946	11.8341	5.27874	5.70703	-0.42829
87	8	19.4	117	17.8	13.5723	14.2	54	1	2	3.4532	2.63302	2.52261	1.92346	0.59915
88	8	24.1	125	18	16.6585	15.4	53	1	2	4.338	4.01469	2.77632	2.5694	0.206918
89	8	24.3	126	17.4	16.6585	15.3	60	1	2	4.2282	4.04801	2.66327	2.54977	0.1135
90	8	27.7	123	20.3	19.1981	15.9	65	1	2	5.6231	5.31787	3.71677	3.51502	0.201749
91	8	22.9	121	18.3	17.3204	15.6	60	1	2	4.1907	3.96636	2.8623	2.70908	0.153226
93	8	41.1	129	38.1	35.1919	24.7	80	1	4	15.6591	14.4639	9.40995	8.69171	0.718242
94	8	39.4	128	37	35.1919	24	81	1	4	14.578	13.8656	8.89771	8.4629	0.434807
98	8	45.7	128	42.3	37.8121	27.9	95	1	4	19.3311	17.2801	11.7988	10.547	1.25181
99	11	31.1	138	17.7	17.6266	16.3	59	1	2	5.5047	5.48187	2.89052	2.87853	0.01199
100	11	31.1	138	19.6	17.6266	16.3	64	1	2	6.0956	5.48187	3.2008	2.87853	0.322271
101	11	63.8	150	39.5	35.7658	28.4	89	1	4	25.201	22.8186	11.2004	10.1416	1.05884
105	10	29.2	138	14	15.7818	15.3	62	1	2	4.088	4.60829	2.14661	2.41981	-0.273206
106	9	21.9	124	16.8	13.5723	14.2	58	1	2	3.6792	2.97233	2.39282	1.9331	0.459723
107	10	22.4	124	12.8	14.8522	14.6	49	1	2	2.8672	3.32689	1.86472	2.16369	-0.298968
108	10	28	138	15.9	14.6534	14.7	57	1	2	4.452	4.10295	2.33774	2.15446	0.183286
110	11	31.3	140	17.9	17.6266	16	63	1	2	5.6027	5.51712	2.85852	2.81486	0.0436635
111	10	47.6	137	35.3	35.8058	25.4	78	1	4	16.8028	17.0436	8.95242	9.08069	-0.12827
112	9	28	142	10.7	13.2406	13.9	55	1	2	2.996	3.70736	1.48582	1.8386	-0.352787
114	11	52.4	145	35	35.1919	24.9	85	1	4	18.34	18.4406	8.72295	8.77078	-0.0478287
115	9	23.6	127	9.4	14.8522	14.6	57	1	2	2.2184	3.50512	1.37541	2.17318	-0.797767
116	11	34.3	142	18.6	21.1071	17	61	1	2	6.3798	7.23973	3.16396	3.59042	-0.426466
117	10	28.9	127	24.3	23.8297	17.9	58	1	2	7.0227	6.8868	4.35408	4.26982	0.0842596
118	10	30.9	131	23.3	24.1838	18	67	1	2	7.1997	7.4728	4.19538	4.35453	-0.159142
119	9	28.4	134	20.6	18.844	15.8	63	1	2	5.8504	5.3517	3.25819	2.98045	0.277733
121	10	48.8	141	35.3	35.1919	24.5	80	1	4	17.2264	17.1737	8.66476	8.63822	0.0265323
122	10	33	134	23.6	25.4046	18.4	70	1	2	7.788	8.38353	4.33727	4.66893	-0.331662
123	8	20.2	114	20.7	17.3204	15.5	55	1	2	4.1814	3.49871	3.21745	2.69215	0.525306
125	8	25.2	122	22	20.8789	16.9	62	1	2	5.544	5.26147	3.72481	3.53498	0.189821
127	8	23.6	121	18.7	18.844	16.1	56	1	2	4.4132	4.44719	3.01427	3.03749	-0.0232154
128	8	22	126	17.9	14.8892	13.9	60	1	2	3.938	3.27563	2.48047	2.06326	0.417212
129	8	48.5	137	37.8	35.8058	25.8	80	1	4	18.333	17.3658	9.7677	9.25239	0.515317
130	10	23.8	128	13.5	14.8522	14.5	57	1	2	3.213	3.53482	1.96106	2.15749	-0.196425
131	11	44.5	138	33.2	33.6541	23.4	77	1	4	14.774	14.9761	7.75782	7.86394	-0.106112
132	10	54.2	143	38.5	36.1376	26.5	88	1	4	20.867	19.5866	10.2044	9.57826	0.626155
133	8	22.9	118	19.1	19.6356	16.4	56	1	2	4.3739	4.49655	3.14127	3.22935	-0.0880853
134	11	40.5	148	23.2	23.7986	18.5	64	1	2	9.396	9.63842	4.28963	4.4003	-0.110675
135	9	27.8	136	14.1	16.1135	15	54	1	2	3.9198	4.47957	2.11927	2.42191	-0.302642
136	11	31.4	133	19	23.2274	17.8	62	1	2	5.966	7.2934	3.37272	4.12313	-0.750409
137	9	25.3	128	3	16.6585	15.4	53	1	2	0.759	4.21459	0.463257	2.57238	-2.10913
139	11	47.8	136	36.6	35.8058	25.8	84	1	4	17.4948	17.1152	9.45869	9.25344	0.205254
140	9	28.5	135	16.5	17.3204	15.6	56	1	2	4.7025	4.9363	2.58025	2.70853	-0.128286
142	9	27.2	129	21.8	18.844	16.3	60	1	2	5.9296	5.12557	3.56325	3.08009	0.483159
143	8	27.2	125	23.5	22.9501	17.4	64	1	2	6.392	6.24242	4.09088	3.99515	0.0957288
144	10	24.2	125	16.1	17.3204	15.5	57	1	2	3.8962	4.19153	2.49357	2.68258	-0.189009
145	8	24	125	18.8	16.6585	15.4	58	1	2	4.512	3.99803	2.88768	2.55874	0.32894
146	8	25.9	128	18.7	18.844	15.8	60	1	2	4.8433	4.8806	2.95612	2.97888	-0.0227675
147	11	40.2	147	20.9	23.7986	18.6	64	1	2	8.4018	9.56703	3.8881	4.42733	-0.539233
148	8	19.1	118	15.9	18.844	16.1	15.2	1	2	3.0369	3.59921	2.18105	2.5849	-0.403841
151	9	32.9	140	16.8	20.0155	16.8	66	1	2	5.5272	6.58509	2.82	3.35974	-0.539742
152	11	31.4	140	16.6	17.6266	16	59	1	2	5.2124	5.53475	2.65939	2.82385	-0.164462
153	11	78.9	161	42.6	40.5194	30.4	94	1	4	33.6114	31.9698	12.9669	12.3336	0.633303
155	11	42.8	153	21.6	22.8634	18.3	64	1	2	9.2448	9.78552	3.94925	4.18024	-0.230989
156	11	52.7	146	33.4	35.1919	24.7	77	1	4	17.6018	18.5461	8.25755	8.70057	-0.443017
157	8	19.4	115	14.1	15.53	14.7	54	1	2	2.7354	3.01283	2.06836	2.27813	-0.209773
158	11	26.4	133	13	16.6585	14.9	57	1	2	3.432	4.39783	1.94019	2.4862	-0.546009
159	11	60.3	150	37.2	35.7658	26.8	85	1	4	22.4316	21.5668	9.9696	9.58524	0.384357
160	10	39.2	145	22	23.7986	18.6	61	1	2	8.624	9.32904	4.10178	4.43712	-0.335335
161	10	28.9	137	18.1	15.7818	15.4	59	1	2	5.2309	4.56095	2.78699	2.43004	0.356946
162	8	20	114	16.5	16.6585	15.4	56	1	2	3.3	3.33169	2.53924	2.56363	-0.0243867
163	11	38.3	149	16.8	21.1071	17.3	62	1	2	6.4344	8.08401	2.89825	3.64128	-0.743033
166	11	30.8	142	14.3	15.7818	15.3	57	1	2	4.4044	4.8608	2.18429	2.41063	-0.226346
167	8	42.6	126	39.8	36.1376	26.8	81	1	4	16.9548	15.3946	10.6795	9.69678	0.982732
171	11	37.5	140	23.8	26.1939	19.1	64	1	2	8.925	9.82271	4.55357	5.01159	-0.458015
172	11	35.3	145	16.7	19.0358	16.8	64	1	2	5.8951	6.71965	2.80385	3.19603	-0.392176
173	8	45.2	141	33.1	32.9208	22.7	71	1	4	14.9612	14.8802	7.52538	7.48464	0.0407367
176	11	32.2	138	17.6	19.6614	16.9	57	1	2	5.6672	6.33097	2.97585	3.32439	-0.348547
177	11	44.8	150	24.7	27.1113	19.9	68	1	2	11.0656	12.1459	4.91804	5.39817	-0.480122
178	11	39.3	158	18.9	17.6266	15.7	63	1	2	7.4277	6.92725	2.97536	2.77489	0.20047
179	11	34.6	141	17.5	21.1071	17.4	57	1	2	6.055	7.30305	3.04562	3.67338	-0.627758
180	10	30.4	144	15.2	14.6534	14.7	59	1	2	4.6208	4.45463	2.2284	2.14826	0.0801355
182	11	40.2	140	25.8	30.5545	20.5	70	1	2	10.3716	12.2829	5.29163	6.26679	-0.975155
183	11	31.8	142	15.5	17.6266	15.8	56	1	2	4.929	5.60525	2.44446	2.77983	-0.335376
184	11	38.4	150	19.1	21.1071	17.1	60	1	2	7.3344	8.10511	3.25973	3.60227	-0.34254
185	11	26.6	130	15.5	18.844	15.7	57	1	2	4.123	5.01251	2.43964	2.96598	-0.526338
186	8	23.4	123	16.4	17.3204	15.5	56	1	2	3.8376	4.05296	2.53659	2.67894	-0.142352
188	9	30.8	131	21.1	23.8297	17.9	61	1	2	6.4988	7.33956	3.78696	4.27689	-0.489927
189	8	28.9	135	19.5	18.844	15.9	59	1	2	5.6355	5.44592	3.09218	2.98816	0.10402
190	8	34	129	31.3	30.2689	20.4	66	1	2	10.642	10.2914	6.39505	6.18438	0.210673
191	9	23	121	16.3	18.844	15.7	55	1	2	3.749	4.33413	2.56062	2.96027	-0.399649
192	9	22.4	121	17	16.6585	15.3	54	1	2	3.808	3.7315	2.60092	2.54866	0.0522532
194	11	33.4	143	17.7	17.6266	16.3	61	1	2	5.9118	5.88728	2.891	2.87901	0.011992
196	11	39	142	24.4	25.9224	19.3	66	1	2	9.516	10.1097	4.7193	5.01375	-0.294453
198	11	31.5	139	12.8	17.6266	16.3	55	1	2	4.032	5.55237	2.08685	2.87375	-0.786902
199	9	25	125	18.1	18.844	16	53	1	2	4.525	4.71101	2.896	3.01504	-0.119044
200	8	29.2	129	22.5	22.9501	17.5	61	1	2	6.57	6.70143	3.94808	4.02706	-0.0789769
201	8	23.4	118	22.8	20.8789	16.8	58	1	2	5.3352	4.88565	3.83166	3.5088	0.322859
202	11	32.3	142	15.7	17.6266	16	59	1	2	5.0711	5.69339	2.51493	2.82354	-0.308612
203	9	26.2	127	19.8	18.844	16.2	60	1	2	5.1876	4.93713	3.21632	3.06103	0.155289
204	9	25.6	133	10.1	14.8522	14.5	58	1	2	2.5856	3.80216	1.4617	2.14945	-0.687751
205	8	26.2	128	18.5	18.844	16	58	1	2	4.847	4.93713	2.95837	3.01339	-0.0550136
206	8	24	120	22.7	20.8789	16.7	56	1	2	5.448	5.01092	3.78333	3.47981	0.303525
208	11	33.7	143	11.5	17.7926	16.5	55	1	2	3.8755	5.9961	1.8952	2.93222	-1.03702
209	9	24.6	119	21.8	22.9501	17.4	59	1	2	5.3628	5.64572	3.78702	3.98681	-0.199789
210	11	33.8	138	21.7	22.3417	17.7	64	1	2	7.3346	7.55148	3.8514	3.96528	-0.113883
214	11	28.1	138	12	14.6534	14.8	56	1	2	3.372	4.1176	1.77064	2.16215	-0.391516
216	8	22.1	117	17.3	18.844	16.1	55	1	2	3.8233	4.16453	2.79297	3.04225	-0.249273
218	8	22.3	126	13.8	13.5723	14	56	1	2	3.0774	3.02662	1.9384	1.90641	0.0319855
220	9	42.6	137	30.6	31.9403	22.7	63	1	4	13.0356	13.6066	6.94528	7.2495	-0.304214
221	8	27.8	140	13.5	13.2406	14.2	50	1	2	3.753	3.68088	1.9148	1.878	0.0367968
222	8	20.6	123	8.4	13.5723	13.6	45	1	2	1.7304	2.79589	1.14376	1.84803	-0.704271
223	8	24.2	127	16.6	16.6585	15	53	1	2	4.0172	4.03135	2.49067	2.49944	-0.00877208
224	8	24.6	123	20.9	18.844	16.3	55	1	2	5.1414	4.63563	3.39837	3.06407	0.334305
225	10	39.6	142	22.6	27.4831	19.6	66	1	2	8.9496	10.8833	4.43841	5.39739	-0.958988
226	8	24.4	118	22.4	23.3042	17.5	65	1	2	5.4656	5.68622	3.92531	4.08375	-0.158443
229	8	20.3	118	15.6	14.8522	14.6	54	1	2	3.1668	3.015	2.27435	2.16532	0.109023
232	10	30.9	140	16.6	17.6266	15.8	57	1	2	5.1294	5.44661	2.61704	2.77888	-0.161843
235	10	28.4	135	18.4	17.3204	15.6	57	1	2	5.2256	4.91898	2.86727	2.69903	0.16824
236	10	23.7	129	12.3	13.5723	14.2	51	1	2	2.9151	3.21663	1.75176	1.93296	-0.181198
237	10	24.2	119	22.3	22.9501	17.1	57	1	2	5.3966	5.55392	3.81089	3.92198	-0.111095
238	9	57.9	144	41.1	36.4802	27.9	88	1	4	23.7969	21.1221	11.4761	10.1862	1.28995
240	10	29	137	18.7	16.1029	15.5	61	1	2	5.423	4.66985	2.88934	2.48806	0.401276
241	8	21.9	117	21.3	18.844	16	58	1	2	4.6647	4.12684	3.40763	3.01471	0.392913
245	8	28.3	127	24.2	22.9501	17.5	59	1	2	6.8486	6.49487	4.24614	4.02683	0.21931
247	9	24	130	3	13.5723	14.2	58	1	2	0.72	3.25735	0.426036	1.92743	-1.50139
249	11	41.4	147	21.7	25.5683	19.2	59	1	2	8.9838	10.5853	4.15743	4.89855	-0.741119
250	10	29	130	19.9	22.9501	17.2	45	1	2	5.771	6.65553	3.41479	3.93818	-0.523388
251	8	24.5	128	16.4	16.6585	15	51	1	2	4.018	4.08132	2.45239	2.49104	-0.0386498
252	10	43.6	149	25.8	27.7377	19.6	72	1	2	11.2488	12.0937	5.0668	5.44735	-0.380549
254	9	26.1	134	15.6	14.8522	14.5	57	1	2	4.0716	3.87642	2.26754	2.15885	0.108697
256	11	42.1	159	17.2	19.6446	16.7	72	1	2	7.2412	8.27036	2.86429	3.27137	-0.407089
257	11	32.9	148	10.9	15.7818	15	63	1	2	3.5861	5.19222	1.63719	2.37044	-0.733255
259	10	26.2	128	19.7	18.844	16	55	1	2	5.1614	4.93713	3.15027	3.01339	0.136881
260	11	31.5	137	17.3	19.6614	16.8	60	1	2	5.4495	6.19334	2.90346	3.29977	-0.396315
262	8	27.4	123	22.9	23.8297	18.1	51	1	2	6.2746	6.52935	4.1474	4.31579	-0.168386
263	11	29.5	139	13.4	15.7818	15.3	57	1	2	3.953	4.65564	2.04596	2.40963	-0.363666
264	8	21.7	122	15.5	14.8522	14.6	54	1	2	3.3635	3.22293	2.25981	2.16536	0.0944455
265	11	26.4	133	14.1	16.6585	14.9	57	1	2	3.7224	4.39783	2.10436	2.4862	-0.381839
268	11	39.6	143	23.4	28.1095	19.4	70	1	2	9.2664	11.1314	4.53147	5.44348	-0.912008
269	9	26.9	130	17.8	18.844	15.9	55	1	2	4.7882	5.06904	2.83325	2.99943	-0.166179
270	9	25.9	122	23.5	22.9501	17.4	59	1	2	6.0865	5.94407	4.08929	3.9936	0.0956916
271	10	32.3	140	17	18.4181	16.5	54	1	2	5.491	5.94906	2.80153	3.03524	-0.233705
272	9	24	130	3	13.5723	14.2	58	1	2	0.72	3.25735	0.426036	1.92743	-1.50139
273	9	44.8	147	31.6	30.5545	20.73	72	1	2	14.1568	13.6884	6.55134	6.33459	0.216757
274	10	42.5	141	27.4	30.7776	21.7	70	1	2	11.645	13.0805	5.85735	6.57939	-0.722039
275	9	25.6	128	28.1	18.844	15.62	60	1	2	7.1936	4.82407	4.39062	2.94438	1.44625
276	11	33.7	134.5	26	25.119	18.6	65	1	2	8.762	8.46512	4.84349	4.67938	0.164113
277	11	44.7	150	30	26.1771	19	70	1	2	13.41	11.7011	5.96	5.20051	0.759492
278	9	29.4	137.5	16.9	17.6266	16.3	60	1	2	4.9686	5.18221	2.62802	2.74101	-0.112986
279	9	34.1	139	23.9	23.3221	17.6	71	1	2	8.1499	7.95285	4.21816	4.11617	0.101986
280	11	40.9	144	30.4	27.129	19.7	61	1	2	12.4336	11.0958	5.99614	5.35097	0.645175
281	11	44.3	149	30.7	32.5491	22	77	1	2	13.6001	14.4192	6.1259	6.49486	-0.368962
282	11	41	142	30.8	27.129	20.3	58	1	2	12.628	11.1229	6.26265	5.51621	0.746432
283	9	34.5	139	24.8	23.843	17.85	67	1	2	8.556	8.22584	4.42834	4.25746	0.170881
284	11	36.8	140	25	24.7782	18.7	67	1	2	9.2	9.11839	4.69388	4.65224	0.0416389
285	11	44.2	158	31.8	22.3248	17.7	73	1	2	14.0556	9.86757	5.63035	3.95272	1.67763
286	11	34.9	149	18.4	18.2353	15.7	78	1	2	6.4216	6.36412	2.89248	2.86659	0.0258888
287	10	25.6	129	15.9	17.96	15.4	71	1	2	4.0704	4.59777	2.44601	2.76292	-0.316911
288	11	51	155	30.9	30.4058	21.22	81	1	2	15.759	15.507	6.55942	6.45452	0.104898
289	11	36.9	134	27.9	30.2689	20.6	65	1	2	10.2951	11.1692	5.73352	6.22033	-0.48681
290	10	27.1	130.4	18.6	18.844	15.93	58	1	2	5.0406	5.10673	2.96433	3.00322	-0.0388908
291	10	32.6	135	17.1	23.5898	17	71	1	2	5.5746	7.69027	3.05877	4.21962	-1.16086
292	10	28.2	137	14.2	15.7818	15	55	1	2	4.0044	4.45048	2.13352	2.37118	-0.237666
293	11	32.9	139.5	18.8	22.0867	17	65	1	2	6.1852	7.26653	3.17838	3.73404	-0.555662
294	11	53	159	33.3	30.4058	20.96	82	1	2	17.649	16.1151	6.98113	6.37439	0.60674
295	10	30.8	137	14.5	18.4181	16.4		1	2	4.466	5.67279	2.37946	3.02242	-0.642969
296	10	42.1	144	28	28.1095	20	72	1	2	11.788	11.8341	5.6848	5.70703	-0.0222333
297	9	36.3	139	28.3	24.4694	18	72	1	2	10.2729	8.88241	5.31696	4.59728	0.71968
298	9	31.5	138.5	20.9	17.9807	16.3	68	1	2	6.5835	5.66391	3.43208	2.95268	0.479398
299	10	34.8	138	27.11	23.843	18.27	66	1	2	9.43428	8.29737	4.95394	4.35695	0.596991
300	11	39.9	140	25	28.7351	20	80	1	2	9.975	11.4653	5.08929	5.84964	-0.760356
301	9	31.6	132.5	24.7	24.1838	18.1	67	1	2	7.8052	7.64209	4.44582	4.35292	0.0929071
302	10	37.3	145	23.3	21.7161	17.7	60	1	2	8.6909	8.1001	4.1336	3.8526	0.281
303	11	36.6	151	16.5	18.2353	16.1	71	1	2	6.039	6.67412	2.64857	2.92712	-0.278551
304	10	35.4	143	22.9	22.0876	17.31	69	1	2	8.1066	7.819	3.9643	3.82366	0.140643
305	9	29.5	136	12.2	17.9583	15.94	63	1	2	3.599	5.2977	1.94583	2.86424	-0.918413
306	10	42	152	26.4	26.1771	18.9	72	1	2	11.088	10.9944	4.79917	4.75864	0.0405288
307	10	32	135	27.7	23.5815	17.53	65	1	2	8.864	7.54607	4.86365	4.1405	0.723146
308	11	30.7	139	17.5	17.9807	16.1	67	1	2	5.3725	5.52006	2.78065	2.85703	-0.076374
309	9	43.7	155	14.7	23.4721	18.2	80	1	2	6.4239	10.2573	2.67384	4.26943	-1.59559
310	11	36.9	143	22	23.8439	18.04	77	1	2	8.118	8.79839	3.96988	4.3026	-0.332723
311	9	30.8	131	24.1	24.1838	18	65	1	2	7.4228	7.44862	4.32539	4.34043	-0.0150453
312	9	26.4	132	14.6	16.6585	15.2	63	1	2	3.8544	4.39783	2.21212	2.52401	-0.311889
313	9	29.4	136	16.5	17.9583	16	60	1	2	4.851	5.27974	2.62273	2.85453	-0.231801
314	10	30.1	132	23	23.3042	17.3	68	1	2	6.923	7.01455	3.97326	4.0258	-0.0525448
315	10	32.3	130.5	28.9	24.765	18.37	63	1	2	9.3347	7.99908	5.48125	4.69698	0.784262
316	10	37.5	150	10.9	17.7749	16.66	65	1	2	4.0875	6.66558	1.81667	2.96248	-1.14581
317	10	28.8	135	12.4	18.844	15.8	62	1	2	3.5712	5.42708	1.95951	2.97782	-1.01831
318	10	27.4	135	19.8	19.6356	16.5	63	1	2	5.4252	5.38015	2.97679	2.95207	0.024718
319	9	27	125	19	23.0102	27	57	1	2	5.13	6.21276	3.2832	3.97617	-0.692965
320	9	25.2	123	24	23.0102	26	59	1	2	6.048	5.79857	3.99762	3.83275	0.164866
321	10	25.7	130	19	16.6585	15	53	1	2	4.883	4.28123	2.88935	2.53327	0.35608
322	9	34.4	140	30	23.3221	17.8	69	1	2	10.32	8.02282	5.26531	4.09328	1.17203
323	11	39.7	156	16.9	17.6266	16.3	63	1	2	6.7093	6.99775	2.75694	2.87547	-0.118529
324	11	66.5	166	30.5	34.8201	24.1	93	1	2	20.2825	23.1554	7.36047	8.40303	-1.04257
325	9	27	125	23.7	22.9501	17.4	62	1	2	6.399	6.19652	4.09536	3.96578	0.129585
326	10	36.8	147	22.2	21.4611	17	65	1	2	8.1696	7.8977	3.78065	3.65482	0.125826
327	11	45.1	157	22.1	23.4721	18.3	87	1	2	9.9671	10.5859	4.04361	4.29466	-0.251052
328	11	42.6	150	21	25.5506	18.9	66	1	2	8.946	10.8846	3.976	4.83759	-0.861587
329	11	30.1	139	12.5	16.1029	15.57	59	1	2	3.7625	4.84698	1.94736	2.50866	-0.561294
330	9	37.9	137	28.3	28.7351	20.2	71	1	2	10.7257	10.8906	5.71458	5.80244	-0.0878554
331	11	37.2	145	21.2	22.6966	17.7	78	1	2	7.8864	8.44313	3.75096	4.01576	-0.264793
332	9	36.8	140	30.1	27.7546	19.38	63	1	2	11.0768	10.2137	5.65143	5.21106	0.440364
333	9	34.2	138	22	23.843	18	66	1	2	7.524	8.15431	3.95085	4.28183	-0.330977
334	10	37.8	143	22	24.1527	18.5	68	1	2	8.316	9.1297	4.0667	4.46462	-0.397919
335	10	30	138	18.8	17.0834	15.5	69	1	2	5.64	5.12502	2.96156	2.69115	0.270414
336	10	22.3	127	6.7	14.0806	27	61	1	2	1.4941	3.13998	0.926344	1.94679	-1.02045
337	9	30.6	135	31.6	21.2329	16.79	65	1	2	9.6696	6.49728	5.30568	3.56503	1.74064
338	9	49.5	132	20.4	21.2329	16.9	65	1	2	10.098	10.5103	5.79545	6.03208	-0.236628
339	10	36	146	21	19.3899	16.9	67	1	2	7.56	6.98037	3.54663	3.27471	0.271923
340	10	38.1	144	26.4	24.1527	18.4	66	1	2	10.0584	9.20216	4.85069	4.43777	0.412924
341	9	38	138	18.7	28.1087	19.95	66	1	2	7.106	10.6813	3.73136	5.60874	-1.87739
342	11	42.2	143.5	26.3	27.4831	20.35	66	1	2	11.0986	11.5979	5.3897	5.63215	-0.242453
343	10	32.5	138	18.7	21.7326	17.1	60	1	2	6.0775	7.06311	3.19129	3.70884	-0.517543
344	9	28.5	130	20.9	20.8789	16.8	61	1	2	5.9565	5.95047	3.52456	3.52099	0.00356669
345	9	28	127	27.9	22.9501	17	57	1	2	7.812	6.42602	4.84345	3.98414	0.859307
346	11	47.7	150.5	31.6	30.4058	21.1	73	1	2	15.0732	14.5036	6.65476	6.40328	0.25148
347	10	41.3	140	29.6	30.7776	21.07	73	1	2	12.2248	12.7112	6.23714	6.48528	-0.24814
348	9	28.9	136	14.8	18.3124	15.9	67	1	2	4.2772	5.29228	2.3125	2.86131	-0.548809
349	11	36.5	141	23	22.8634	18.3	60	1	2	8.395	8.34513	4.22262	4.19754	0.0250847
350	11	32.4	139	18.6	19.6614	16.8	64	1	2	6.0264	6.3703	3.11909	3.29708	-0.177991
351	10	45.4	149	31.4	30.1827	20.4	78	1	2	14.2556	13.703	6.42115	6.17223	0.248927
352	11	41.3	141.5	28.2	30.7776	21	72	1	2	11.6466	12.7112	5.81683	6.34851	-0.531686
353	11	39.9	140.5	23.8	28.1095	20.2	69	1	2	9.4962	11.2157	4.81058	5.68164	-0.87106
354	9	32.6	141	18	18.7731	16.4	71	1	2	5.868	6.12002	2.95156	3.07833	-0.126764
355	9	27.5	133	15.1	17.3204	15.5	58	1	2	4.1525	4.7631	2.3475	2.69269	-0.345185
356	9	26.7	130	23	19.4837	15.7	72	1	2	6.141	5.20215	3.63373	3.0782	0.555532
357	11	41.7	145	21	27.129	19.8	64	1	2	8.757	11.3128	4.16504	5.38064	-1.2156
358	10	26.2	127	19	18.844	16.24	64	1	2	4.978	4.93713	3.08637	3.06103	0.0253368
359	9	23.9	125.5	16	16.6585	15.17	61	1	2	3.824	3.98137	2.4279	2.52782	-0.0999178
360	9	27.7	135	16	16.6585	15	60	1	2	4.432	4.61439	2.43182	2.5319	-0.100079
361	11	45.6	157	20.9	23.7809	18.5	68	1	2	9.5304	10.8441	3.86644	4.3994	-0.532957
362	10	29.7	137	16.5	18.6071	15.8	72	1	2	4.9005	5.5263	2.61095	2.94438	-0.333423
363	10	34.4	135	23.7	26.8888	18.87	65	1	2	8.1528	9.24974	4.47342	5.0753	-0.601888
364	10	32.7	131.5	28.5	26.5347	19.1	63	1	2	9.3195	8.67685	5.38941	5.01777	0.371642
365	10	31	130	16.8	24.765	18.7	62	1	2	5.208	7.67714	3.08166	4.54268	-1.46103
366	11	39.3	150	25.5	22.8634	18	64	1	2	10.0215	8.9853	4.454	3.99347	0.460532
367	9	37.5	138.5	28.5	28.1087	19.4	65	1	2	10.6875	10.5407	5.57156	5.49505	0.0765036
368	9	30.6	132	25.5	23.2274	17.6	62	1	2	7.803	7.10758	4.47831	4.07919	0.399117
369	9	27.8	137	13.4	14.6534	14.8	61	1	2	3.7252	4.07364	1.98476	2.17041	-0.185648
370	11	37.2	138.5	32.1	26.548	19.2	65	1	2	11.9412	9.87585	6.22513	5.14843	1.0767
371	10	35	135	27	25.4046	18.6	73	1	2	9.45	8.89163	5.18519	4.87881	0.306378
372	10	29	133	33	19.6356	16.39	58	1	2	9.57	5.69432	5.41014	3.21913	2.19101
373	9	35	139	23.4	23.4889	18	64	1	2	8.19	8.22113	4.23891	4.25502	-0.0161115
374	9	45.6	145	35	30.7776	21.68	87	1	2	15.96	14.0346	7.59096	6.67519	0.915771
375	11	41.8	153.5	17.3	22.3248	17.8	69	1	2	7.2314	9.33177	3.06906	3.96048	-0.891414
376	11	50.3	154	29.7	30.4058	21.2	70	1	2	14.9391	15.2941	6.29917	6.44887	-0.149706
377	11	40	154	15.3	19.0181	16.9	67	1	2	6.12	7.60726	2.58054	3.20765	-0.627112
378	10	33.4	134.5	27	26.5347	19	62	1	2	9.018	8.86259	4.98501	4.8991	0.085908
379	10	21.2	124	7.2	13.5723	13.7	55	1	2	1.5264	2.87732	0.992716	1.87131	-0.878593
380	9	26.1	124	25.4	20.8789	16.9	59	1	2	6.6294	5.44938	4.31152	3.54408	0.767443
381	10	34.2	146	19.3	17.6266	16	64	1	2	6.6006	6.02829	3.09655	2.82806	0.268488
382	9	29	129	15	22.9501	17	62	1	2	4.35	6.65553	2.61403	3.99947	-1.38545
383	9	23.7	128	14.5	14.8522	14.46	55	1	2	3.4365	3.51997	2.09747	2.14842	-0.0509468
384	11	33.5	145	18.2	17.6266	15.93	62	1	2	6.097	5.9049	2.89988	2.80852	0.0913654
385	11	38.3	140	26.7	28.1087	19.5	66	1	2	10.2261	10.7656	5.2174	5.49266	-0.275264
386	11	41.2	144	31.6	26.5488	19	70	1	2	13.0192	10.9381	6.27855	5.27494	1.00361
387	10	36.4	147	12.5	19.0358	16.84	61	1	2	4.55	6.92904	2.1056	3.20655	-1.10095
388	10	34.5	137	26.3	25.4046	18.4	72	1	2	9.0735	8.7646	4.8343	4.66972	0.164579
389	11	38.8	141	28.9	28.1095	19.5	70	1	2	11.2132	10.9065	5.64016	5.48589	0.154273
390	10	31.6	135	24.1	22.9501	17.3	60	1	2	7.6156	7.25223	4.17866	3.97927	0.199381
391	11	28.9	130	31.1	22.9501	17.1	58	1	2	8.9879	6.63258	5.31828	3.9246	1.39368
392	10	30	139	16.1	16.457	15.5	65	1	2	4.83	4.9371	2.49987	2.5553	-0.0554308
393	10	37.9	146.5	24.2	22.0702	17.7	66	1	2	9.1718	8.36459	4.27346	3.89735	0.376107
394	9	35.3	139	26.7	24.4694	18.3	70	1	2	9.4251	8.63771	4.87816	4.47063	0.40753
395	9	29.1	135.5	17.7	19.1981	15.9	68	1	2	5.1507	5.58665	2.80535	3.0428	-0.237441
396	9	23.7	124	16.2	16.6585	15.4	57	1	2	3.8394	3.94806	2.49701	2.56767	-0.0706661
397	11	50.4	156	29.8	30.1827	20.71	72	1	2	15.0192	15.2121	6.1716	6.25086	-0.0792627
398	11	32.6	142	15.1	17.6266	16.1	59	1	2	4.9226	5.74626	2.44128	2.84976	-0.408483
399	10	21.6	129	16.2	14.8892	14.1	61	1	2	3.4992	3.21608	2.10276	1.93262	0.170136
400	9	36.8	140	25	25.4046	18.7	71	1	2	9.2	9.34891	4.69388	4.76985	-0.0759742
401	10	32.9	134	20	24.4694	18.3	70	1	2	6.58	8.05044	3.66451	4.48343	-0.818915
402	9	32.2	139	17	19.6614	16.7	63	1	2	5.474	6.33097	2.83319	3.27673	-0.443545
403	11	47	156	25.6	26.1771	19.3	73	1	2	12.032	12.3032	4.94412	5.05556	-0.111446
404	11	45.6	149	30	29.5563	20.5	65	1	2	13.68	13.4777	6.16188	6.07075	0.0911326
405	10	45	149	31.6	27.7377	20	72	1	2	14.22	12.482	6.40512	5.62226	0.782854
406	9	34.4	140	20.4	22.3417	17.6	63	1	2	7.0176	7.68553	3.58041	3.92119	-0.34078
407	9	37.7	139	29.2	28.1087	19.5	67	1	2	11.0084	10.597	5.69763	5.48469	0.212946
408	10	31	130	25.6	23.8297	17.9	62	1	2	7.936	7.38722	4.69586	4.37114	0.32472
409	10	27	130	11.1	13.5723	14.3	58	1	2	2.997	3.66452	1.77337	2.16835	-0.394981
410	11	32.8	135	27.5	24.1838	18	65	1	2	9.02	7.9323	4.94925	4.35243	0.59682
411	10	33.8	134.5	25	25.119	18.8	67	1	2	8.45	8.49023	4.67102	4.69327	-0.0222411
412	10	34.8	144	19.6	19.0358	16.8	63	1	2	6.8208	6.62447	3.28935	3.19467	0.0946808
413	10	36	140	30	24.4694	18	69	1	2	10.8	8.809	5.5102	4.49439	1.01582
414	11	26.6	133	21.3	16.6585	14.9	56	1	2	5.6658	4.43115	3.20301	2.50503	0.697975
415	9	37.2	138.5	34.8	28.7351	19.54	70	1	2	12.9456	10.6895	6.74874	5.57257	1.17617
416	11	32.8	139.5	19.2	19.6614	16.9	55	1	2	6.2976	6.44894	3.23614	3.3139	-0.0777694
417	10	29.1	133	17	19.6356	16.5	64	1	2	4.947	5.71396	2.79665	3.23023	-0.433578
418	11	43.4	154	24.2	23.4721	18	72	1	2	10.5028	10.1869	4.42857	4.29537	0.133205
419	11	48.5	150	29.3	30.4058	21.5	70	1	2	14.2105	14.7468	6.31578	6.55415	-0.238372
420	11	39.8	158	19	17.6089	15.9	66	1	2	7.562	7.00834	3.02916	2.80738	0.221783
421	11	43.9	156	22.8	23.4721	18	70	1	2	10.0092	10.3043	4.11292	4.23416	-0.121241
422	11	48.8	154	27	27.7377	20	76	1	2	13.176	13.536	5.55574	5.70755	-0.151805
423	10	31.4	140	17.6	17.6266	16	56	1	2	5.5264	5.53475	2.81959	2.82385	-0.00425818
424	9	30.3	136	19.3	18.9388	16	69	1	2	5.8479	5.73845	3.16171	3.10254	0.0591727
425	11	50	154	29	30.4058	21	70	1	2	14.5	15.2029	6.11402	6.41041	-0.296393
426	11	38.9	138.5	33.4	30.5545	20.42	73	1	2	12.9926	11.8857	6.77324	6.19619	0.577046
427	10	47.5	151	31.9	29.7794	20.83	67	1	2	15.1525	14.1452	6.64554	6.20378	0.441766
428	10	47.3	151	25.7	30.1827	20.74	70	1	2	12.1561	14.2764	5.33139	6.26132	-0.929928
429	10	43.8	145	30.9	30.7776	20.83	72	1	2	13.5342	13.4806	6.43719	6.4117	0.0254961
430	9	35.1	136	32.7	27.1744	18.97	70	1	2	11.4777	9.53821	6.2055	5.1569	1.0486
431	11	36.7	146	29.3	21.1071	17.2	60	1	2	10.7531	7.74629	5.04461	3.63403	1.41059
432	11	41.5	151	20.2	22.8457	18.2	68	1	2	8.383	9.48096	3.67659	4.15813	-0.48154
433	9	32.2	135	23.9	23.8671	17.6	72	1	2	7.6958	7.6852	4.22266	4.21684	0.00581851
434	9	28.3	129	26.8	22.9501	17	59	1	2	7.5844	6.49487	4.55766	3.90294	0.654723
435	10	31.9	136	30.1	28.7351	20	71	1	2	9.6019	9.16649	5.19134	4.95593	0.235407
436	10	34.5	140	23.7	22.6957	17.6	68	1	2	8.1765	7.83003	4.17168	3.99491	0.176772
437	10	34.3	137	23.3	23.4889	18.2	64	1	2	7.9919	8.05671	4.25803	4.29256	-0.0345285
438	10	32.1	130	30.6	26.5347	18.99	64	1	2	9.8226	8.51764	5.81219	5.04002	0.772166
439	10	37.6	140.5	23.7	25.5683	19.1	62	1	2	8.9112	9.61369	4.51423	4.87009	-0.355866
440	9	33.8	137	23	24.4694	18	72	1	2	7.774	8.27067	4.14194	4.40656	-0.264622
441	11	39.6	150	23.2	21.7161	17.6	64	1	2	9.1872	8.59957	4.0832	3.82203	0.26117
442	9	28.3	130	21.1	21.2329	16.7	66	1	2	5.9713	6.00892	3.53331	3.55557	-0.0222597
443	10	33.3	133.5	27.3	18.844	15.68	62	1	2	9.0909	6.27506	5.10087	3.52091	1.57996
444	11	45	145	30.8	30.7776	21.4	70	1	2	13.86	13.8499	6.59215	6.58736	0.00479156
445	9	35	137.5	30.9	26.548	18.9	67	1	2	10.815	9.29179	5.72033	4.91467	0.805665
446	11	27.4	135	16	16.6585	15	59	1	2	4.384	4.56442	2.40549	2.50448	-0.0989955
447	10	24	126.5	19.9	16.6585	15	59	1	2	4.776	3.99803	2.98458	2.49842	0.486162
448	10	27.8	137	13.9	15.0075	14.8	68	1	2	3.8642	4.17208	2.05882	2.22286	-0.164035
449	9	40.1	140	29.8	29.9281	20.45	65	1	2	11.9498	12.0012	6.09684	6.12304	-0.0262022
450	9	24.3	128	13.5	15.53	14.8	55	1	2	3.2805	3.7738	2.00226	2.30334	-0.301084
451	10	26.4	131.5	19.4	16.6585	15.2	57	1	2	5.1216	4.39783	2.96179	2.54324	0.418549
452	10	26.5	130	17	17.3204	15.6	54	1	2	4.505	4.58989	2.66568	2.71591	-0.0502337
453	9	29.5	135	18.9	18.844	16.2	60	1	2	5.5755	5.55899	3.05926	3.0502	0.00906058
454	11	28.3	134.5	16.6	18.844	16	63	1	2	4.6978	5.33286	2.59687	2.94792	-0.35105
455	9	39.7	145	20.2	22.8634	18		1	2	8.0194	9.07676	3.81422	4.31713	-0.502905
456	10	30	130	29	23.2274	17.7	61	1	2	8.7	6.96821	5.14793	4.1232	1.02473
457	9	26.8	130	25.2	18.844	15.8	59	1	2	6.7536	5.0502	3.99621	2.98828	1.00793
458	9	29.6	137	15.9	17.6266	15.77	54	1	2	4.7064	5.21747	2.50754	2.77983	-0.272293
459	11	46.5	149	32.9	30.4058	20.94	77	1	2	15.2985	14.1387	6.89091	6.36851	0.5224
460	10	29.6	136	19	17.9583	16	56	1	2	5.624	5.31566	3.04066	2.87395	0.166709
461	9	37.4	138	28.7	28.7351	19.6	69	1	2	10.7338	10.7469	5.63632	5.64321	-0.00688948
462	10	30.1	140	12.2	15.7818	15.35	55	1	2	3.6722	4.75033	1.87357	2.42364	-0.550067
463	9	25.6	132	19.1	14.8522	14.6	54	1	2	4.8896	3.80216	2.80624	2.18214	0.624103
464	10	25.4	132	9.4	14.8522	14.57	56	1	2	2.3876	3.77246	1.37029	2.16509	-0.7948
465	11	41.1	142	25.4	27.4831	20	68	1	2	10.4394	11.2956	5.17725	5.60184	-0.424593
466	10	35.3	143	22.2	21.4611	17.3	66	1	2	7.8366	7.57579	3.83227	3.70472	0.127544
467	9	30.5	133	23	23.5898	17.24	71	1	2	7.015	7.19488	3.96574	4.06743	-0.101691
468	10	34.6	140	20.3	23.3221	17.65	89	1	2	7.0238	8.06946	3.58357	4.11707	-0.533502
469	9	25.9	131	14	16.6585	15	60	1	2	3.626	4.31454	2.11293	2.51416	-0.401225
470	9	35.3	136	29.7	26.548	19.2	65	1	2	10.4841	9.37143	5.66831	5.06674	0.601571
472	11	34.1	140	21.8	21.7326	17.4	64	1	2	7.4338	7.41083	3.79276	3.78104	0.0117187
473	11	30	135.5	22.9	18.844	16.2	62	1	2	6.87	5.65321	3.74178	3.07905	0.662732
474	11	47.1	152.5	26	27.7377	20.25	80	1	2	12.246	13.0645	5.26568	5.61762	-0.351939
475	11	30.4	138.5	16.9	17.6266	15.7	56	1	2	5.1376	5.35848	2.67831	2.79346	-0.115148
476	11	48	154	32.4	27.7377	20.2	73	1	2	15.552	13.3141	6.5576	5.61398	0.943617
477	10	39.2	147.5	32	28.1095	20	70	1	2	12.544	11.0189	5.7657	5.06472	0.700981
478	10	30	133	20.3	20.8789	16.7	60	1	2	6.09	6.26366	3.44282	3.54099	-0.0981712
479	9	28.7	132	19.5	19.9897	16.4	65	1	2	5.5965	5.73703	3.21195	3.2926	-0.0806559
480	10	38.1	140	27.1	28.7351	19.43	70	1	2	10.3251	10.9481	5.26791	5.58575	-0.31784
481	9	36.3	136	28.4	20.9736	16.8	78	1	2	10.3092	7.61342	5.57375	4.11625	1.45749
482	11	30.1	135	23.2	19.6356	16.5	64	1	2	6.9832	5.91031	3.83166	3.24297	0.58869
483	9	32.2	133	29.5	24.4694	18.2	71	1	2	9.499	7.87916	5.37	4.45427	0.915734
484	9	25.3	122	22.4	22.9501	17	59	1	2	5.6672	5.80637	3.80758	3.90108	-0.0935045
485	9	37.7	149	17	17.6089	16	67	1	2	6.409	6.63855	2.88681	2.9902	-0.103398
486	9	31.7	132	28	24.1838	18.19	66	1	2	8.876	7.66627	5.09412	4.39984	0.694287
487	10	42.3	147	34.4	28.1095	19.5	70	1	2	14.5512	11.8903	6.73386	5.50249	1.23137
488	11	43.7	157	21.6	21.6984	17.7	67	1	2	9.4392	9.4822	3.82945	3.84689	-0.0174447
489	11	33.8	135	23.4	24.765	18.5	54	1	2	7.9092	8.37056	4.33975	4.5929	-0.253145
490	9	33.4	139.5	20.3	22.0867	17.2	68	1	2	6.7802	7.37697	3.48413	3.79079	-0.306659
491	10	40.9	144	21.8	25.9224	19	66	1	2	8.9162	10.6023	4.29986	5.11297	-0.813108
492	9	31.5	136.5	20.5	22.0644	17	61	1	2	6.4575	6.95027	3.46577	3.73024	-0.264473
493	9	26.9	131	17.3	17.3204	15.6	60	1	2	4.6537	4.65918	2.71179	2.71498	-0.00319117
494	10	29.7	135	21.6	19.1981	16.2	66	1	2	6.4152	5.70184	3.52	3.12858	0.39142
495	11	44.8	147	31.2	29.9281	20.7	68	1	2	13.9776	13.4078	6.46842	6.20472	0.263698
496	10	31.3	131.5	29	23.8297	18.3	63	1	2	9.077	7.45871	5.24917	4.31333	0.935846
497	9	33.5	134	27.4	25.4046	18.65	78	1	2	9.179	8.51056	5.11194	4.73967	0.372268
498	10	38	140.5	30	25.9224	19.25	65	1	2	11.4	9.85051	5.775	4.99006	0.784939
499	9	31.8	133.5	20	24.1838	18	65	1	2	6.36	7.69046	3.56857	4.31509	-0.746515
500	9	36	140	29.4	25.4046	18.36	74	1	2	10.584	9.14567	5.4	4.66616	0.733841
501	10	32.8	140	23.7	19.6614	16.7	60	1	2	7.7736	6.44894	3.96612	3.29028	0.675846
502	11	35	138	23.8	24.4241	18.4	63	1	2	8.33	8.54845	4.37408	4.48879	-0.114709
503	11	38.1	140	30.8	28.1087	19.7	68	1	2	11.7348	10.7094	5.98714	5.46398	0.523163
504	9	30	130.5	22	23.2274	17.61	64	1	2	6.6	6.96821	3.87546	4.09167	-0.216212
505	11	43.4	147	28.2	27.4831	20	67	1	2	12.2388	11.9277	5.66375	5.51977	0.143986
506	9	28.6	136.5	16.2	16.1135	15.4	58	1	2	4.6332	4.60847	2.48666	2.47339	0.0132703
507	11	41.5	152	21.5	22.8634	17.9	61	1	2	8.9225	9.4883	3.86189	4.10678	-0.244892
508	11	30.1	137	17.2	17.6266	16	59	1	2	5.1772	5.3056	2.75838	2.82679	-0.0684109
509	9	28.5	136	12.9	16.1135	15.4	63	1	2	3.6765	4.59236	1.98773	2.48289	-0.495167
510	10	24.8	130	14.9	14.8522	14.6	54	1	2	3.6952	3.68335	2.18651	2.17949	0.0070145
511	10	25.5	130	16.8	16.6585	15.08	60	1	2	4.284	4.24791	2.53491	2.51356	0.0213559
512	10	36.6	138	26	26.548	19.27	67	1	2	9.516	9.71656	4.99685	5.10216	-0.105313
513	11	43.7	146	31.7	29.9281	20.6	66	1	2	13.8529	13.0786	6.49883	6.13556	0.363264
514	10	40	142.5	25	28.1095	20	71	1	2	10	11.2438	4.92459	5.53711	-0.612522
515	10	37	141	24.9	24.7791	18.6	81	1	2	9.213	9.16826	4.63407	4.61157	0.0225055
516	11	29.6	137	14.9	18.6071	15.8	71	1	2	4.4104	5.50769	2.34983	2.93446	-0.584631
517	11	40.1	143	30.3	28.1095	19.6	71	1	2	12.1503	11.2719	5.94176	5.51221	0.42955
518	11	29.1	135	18	18.844	15.9	57	1	2	5.238	5.48361	2.87407	3.00884	-0.134766
519	10	38.3	148	19.5	21.7158	17.5	76	1	2	7.4685	8.31715	3.40965	3.79709	-0.387442
520	10	41	141	32.2	30.5545	20.62	85	1	2	13.202	12.5273	6.64051	6.30116	0.339349
521	10	29.1	138	17.9	15.7818	15.2	55	1	2	5.2089	4.59251	2.73519	2.41153	0.323665
522	10	28.1	133	20.5	19.1981	15.8	66	1	2	5.7605	5.39467	3.25654	3.04973	0.206814
523	11	44	146	31	30.5545	20.64	68.5	1	2	13.64	13.444	6.39895	6.30699	0.0919615
524	10	37.5	138	30	27.1744	19	70	1	2	11.25	10.1904	5.90737	5.35097	0.556398
525	9	31.7	135	23.4	23.5898	17.14	78	1	2	7.4178	7.47796	4.07012	4.10313	-0.0330087
526	10	37.4	146	21.1	22.0876	17.5	70	1	2	7.8914	8.26075	3.7021	3.87538	-0.173274
527	11	41.5	147	22.5	26.5488	19.2	83	1	2	9.3375	11.0178	4.32112	5.09869	-0.777573
528	10	21.7	123	11.5	13.5723	13.8	55	1	2	2.4955	2.94519	1.64948	1.94672	-0.297235
529	10	28.7	137	14.4	15.7818	15.3	62	1	2	4.1328	4.52939	2.20193	2.41323	-0.211298
530	10	28.6	138	16.5	15.7818	15	54	1	2	4.719	4.5136	2.47795	2.37009	0.107854
531	10	29.3	134	18	18.844	16	60	1	2	5.274	5.5213	2.93718	3.0749	-0.137725
532	10	19.9	120	15	14.8892	13.81	59	1	2	2.985	2.96296	2.07292	2.05761	0.0153056
533	9	28.5	134	17.4	18.844	15.8	62	1	2	4.959	5.37055	2.76175	2.99095	-0.229197
534	11	35.6	140.5	25.1	22.8634	18	63	1	2	8.9356	8.13936	4.52659	4.12323	0.403359
535	10	24.7	125	17.8	18.844	15.8	52	1	2	4.3966	4.65447	2.81382	2.97886	-0.165039
536	11	45.1	153	25.7	26.1771	19.2	85	1	2	11.5907	11.8059	4.95139	5.0433	-0.0919094
537	9	36.8	135	30.8	28.7351	20.2	82	1	2	11.3344	10.5745	6.21915	5.8022	0.416949
538	11	49.9	158	26.4	27.7377	20	80	1	2	13.1736	13.8411	5.27704	5.54444	-0.267399
539	10	40.7	145	28.4	25.9224	19.3	65	1	2	11.5588	10.5504	5.49765	5.01803	0.479612
540	9	29.4	134	7.2	18.844	16.37	61	1	2	2.1168	5.54014	1.17888	3.0854	-1.90652
541	11	41.2	153	22	21.6984	17.6	66	1	2	9.064	8.93974	3.87202	3.81893	0.0530824
542	9	27.6	130	19.4	18.844	16.3	58	1	2	5.3544	5.20095	3.16828	3.07749	0.0907984
543	10	30.5	138	18	17.6266	16	58	1	2	5.49	5.37611	2.8828	2.82299	0.0598053
544	11	41.3	148.5	21.2	17.7926	16.6	63	1	2	8.7556	7.34833	3.97039	3.33224	0.638152
545	11	45.8	155	24.1	25.5506	19.1	67	1	2	11.0378	11.7022	4.5943	4.87084	-0.276542
546	11	42	147	26.2	25.9224	19	66	1	2	11.004	10.8874	5.09232	5.03837	0.0539557
547	11	33.5	142	20.5	18.7731	16.61	75	1	2	6.8675	6.28898	3.40582	3.11891	0.286908
548	9	30	129	25.1	24.1838	18	66	1	2	7.53	7.25515	4.52497	4.3598	0.165165
549	11	40	150	12.3	21.6984	17.7	68	1	2	4.92	8.67936	2.18667	3.85749	-1.67083
550	11	39.1	145.5	25.8	24.1527	18.6	65	1	2	10.0878	9.44369	4.76508	4.46083	0.304253
551	10	32.5	136.5	23.8	22.0644	17.3	60	1	2	7.735	7.17092	4.1514	3.84866	0.302746
552	10	42.6	158	18.5	21.1071	17.06	63	1	2	7.881	8.99161	3.15695	3.60183	-0.444885
553	11	38.6	138	30.2	28.7351	20.2	69	1	2	11.6572	11.0917	6.12119	5.82427	0.296922
554	9	33.5	133.5	27.5	25.119	18.79	66	1	2	9.2125	8.41488	5.1691	4.72156	0.447543
555	10	30.1	131	24.1	22.9501	17.5	56	1	2	7.2541	6.90798	4.22708	4.02539	0.201692
556	9	20	118	10.7	13.5723	14.4	56	1	2	2.14	2.71446	1.53691	1.94948	-0.412566
557	9	21.5	126	16	13.5723	13.6	55	1	2	3.44	2.91804	2.16679	1.83802	0.328772
558	9	38.1	140	30.3	28.1087	19.4	68	1	2	11.5443	10.7094	5.88995	5.46398	0.425969
559	10	27.8	133	20	18.844	15.7	61	1	2	5.56	5.23864	3.1432	2.96152	0.181673
560	11	30.6	140	14.6	16.1029	15.6	63	1	2	4.4676	4.92749	2.27939	2.51403	-0.234639
561	10	41.9	148	23.3	25.5683	19.1	60	1	2	9.7627	10.7131	4.45704	4.89094	-0.433905
562	9	33.6	135	25.7	24.765	18.4	64	1	2	8.6352	8.32103	4.73811	4.56572	0.172386
563	10	53.1	144.5	36.1	35.8058	25.43	89	1	4	19.1691	19.0129	9.18049	9.10567	0.074823
564	10	39.6	130.5	32	33.3685	23.25	66	1	4	12.672	13.2139	7.44088	7.75909	-0.318215
565	11	46.1	137	36.7	35.1919	24.56	81	1	4	16.9187	16.2235	9.01417	8.64376	0.370414
566	10	69.9	153.5	35.4	36.7388	29.66	88	1	4	24.7446	25.6804	10.5018	10.899	-0.397173
567	9	41.6	130	34.3	35.1919	24.61	71	1	4	14.2688	14.6398	8.44308	8.66262	-0.219547
568	9	58.1	137.5	39.1	38.1501	30.73	86	1	4	22.7171	22.1652	12.0157	11.7238	0.291906
569	10	75.4	148	30	38.7744	34.4	91	1	4	22.62	29.2359	10.3269	13.3473	-3.02039
570	9	52.6	140	38.5	36.1376	26.83	76	1	4	20.251	19.0084	10.3321	9.69815	0.633993
571	11	54.1	141.5	36.3	36.1376	27.01	74	1	4	19.6383	19.5504	9.80824	9.76436	0.043882
572	11	56.9	153.5	36.9	34.8201	24.14	75	1	4	20.9961	19.8127	8.91091	8.40865	0.50226
573	9	49.3	136	35.2	36.1376	26.65	77	1	4	17.3536	17.8158	9.38235	9.63226	-0.24991
574	11	54.6	142	39.5	36.1376	27.07	89	1	4	21.567	19.7311	10.6958	9.78532	0.910471
575	9	41	133	36.6	33.3685	23.2	68	1	4	15.006	13.6811	8.48324	7.73423	0.749004
576	9	50.2	135	38.7	36.4802	27.6	88	1	4	19.4274	18.3131	10.6598	10.0483	0.611422
577	10	45.6	135	33.1	35.1919	25.02	73	1	4	15.0936	16.0475	8.28181	8.80522	-0.523407
578	11	55.6	146.5	38.6	35.8058	25.7	89	1	4	21.4616	19.908	9.9997	9.27583	0.72387
579	10	54.7	148	36.2	34.2114	24.9	55	1	4	19.8014	18.7136	9.04008	8.54348	0.496602
580	9	54.9	136	38.6	37.4532	29.68	78	1	4	21.1914	20.5618	11.4573	11.1169	0.340386
581	11	57.6	135.5	41.2	38.1501	31.37	80	1	4	23.7312	21.9745	12.9253	11.9685	0.956814
582	11	61.3	145.5	36.1	37.4532	28.95	89	1	4	22.1293	22.9588	10.453	10.8449	-0.391837
583	10	58.6	141.5	39.6	37.4532	29.26	78	1	4	23.2056	21.9476	11.5899	10.9616	0.628306
584	11	59.8	153	33.9	35.434	25.54	78	1	4	20.2722	21.1895	8.66	9.05188	-0.391875
585	9	59.8	137.5	40.1	38.1501	31.62	80	1	4	23.9798	22.8138	12.6835	12.0668	0.616744
586	9	56.7	139.3	38.1	37.4532	29.22	77	1	4	21.6027	21.236	11.1328	10.9438	0.188987
587	11	58.7	140	39.7	37.4532	29.94	78	1	4	23.3039	21.985	11.8897	11.2169	0.672886
588	10	53.3	137.4	37.1	36.4802	28.23	78	1	4	19.7743	19.444	10.4744	10.2994	0.174973
589	10	53.5	140	35.2	36.1376	27.29	76	1	4	18.832	19.3336	9.60816	9.86409	-0.255925
590	9	55.5	142.5	34.1	36.1376	27.33	87	1	4	18.9255	20.0564	9.32004	9.87694	-0.556905
591	11	59.6	145	34.6	36.4802	28.34	79	1	4	20.6216	21.7422	9.80813	10.3411	-0.532998
592	10	56.8	143	36.3	36.4802	27.77	88	1	4	20.6184	20.7208	10.0828	10.1329	-0.0500663
593	10	43	134.5	38.4	35.1919	23.9	70	1	4	16.512	15.1325	9.12757	8.36501	0.762554
594	10	43.9	132	30.1	35.1919	25.1	75	1	4	13.2139	15.4492	7.58374	8.86665	-1.28291
595	11	55.5	144.5	34.8	36.1376	26.43	79	1	4	19.314	20.0564	9.24989	9.60542	-0.355534
596	9	51.2	142	33.9	35.8058	25.39	79	1	4	17.3568	18.3326	8.60782	9.09173	-0.483911
597	10	38.3	123	33.6	34.9063	25.31	68	1	4	12.8688	13.3691	8.50605	8.83675	-0.330698
598	11	61.5	150	37.8	35.1394	27.33	68	1	4	23.247	21.6107	10.332	9.60477	0.727227
599	11	65.3	151	37.1	35.7658	28.63	83	1	4	24.2263	23.3551	10.6251	10.243	0.382094
600	11	35.8	125	35.1	32.2811	22.91		1	4	12.5658	11.5566	8.04211	7.39625	0.645858
601	11	40.8	132.5	33.6	33.6541	23.23	72	1	4	13.7088	13.7309	7.8085	7.82108	-0.0125758
602	9	35.1	136.5	30.7	27.1744	18.83	72	1	4	10.7757	9.53821	5.78336	5.11919	0.664165
603	9	46.5	136	36.1	35.1919	25.14	78	1	4	16.7865	16.3642	9.07575	8.84745	0.2283
604	9	47.5	140	35	35.1919	24.23	80	1	4	16.625	16.7162	8.48214	8.52865	-0.0465083
605	10	39.3	132	36	32.9208	22.21	74	1	4	14.148	12.9379	8.11983	7.42532	0.694512
606	11	53.3	136	34	36.4802	28	83	1	4	18.122	19.444	9.79779	10.5125	-0.714734
607	11	82.9	161	45.5	40.5262	32	91	1	4	37.7195	33.5962	14.5517	12.961	1.59071
608	11	85	153.5	39.4	40.5262	36.07	87	1	4	33.49	34.4473	14.2134	14.6197	-0.406274
609	10	63.9	146.5	37.8	37.4532	29.77	89	1	4	24.1542	23.9326	11.2543	11.151	0.103246
610	10	52.9	139.5	36.9	36.1376	27.18	72	1	4	19.5201	19.1168	10.0308	9.82351	0.20725
611	9	41.2	131	33.7	35.1919	24	71	1	4	13.8844	14.4991	8.09067	8.44885	-0.358176
612	11	73.6	152	36.3	37.4357	31.85	91	1	4	26.7168	27.5527	11.5637	11.9255	-0.361787
613	10	49.8	138.5	32.5	35.8058	25.96	76	1	4	16.185	17.8313	8.43749	9.29572	-0.858229
614	11	59.4	147	36.9	36.4802	27.48	83	1	4	21.9186	21.6693	10.1433	10.0279	0.115384
615	10	58.2	140	42.8	36.8268	29.6	66	1	4	24.9096	21.4332	12.709	10.9353	1.77367
616	10	42.8	133	35.1	35.1919	24.19	74	1	4	15.0228	15.0621	8.49274	8.51497	-0.0222379
617	9	51.6	135.5	36.1	37.4532	29.1	75	1	4	18.6276	19.3259	10.1456	10.5259	-0.380313
618	9	46.7	130	39.1	36.4802	27.63	79	1	4	18.2597	17.0363	10.8046	10.0806	0.72392
619	11	50.1	139	37.6	35.8058	25.93	89	1	4	18.8376	17.9387	9.74981	9.28456	0.465248
620	9	57.9	143	25	36.4802	28.31	79	1	4	14.475	21.1221	7.07859	10.3291	-3.25056
621	10	45.7	138.5	37.4	34.5655	23.82	65	1	4	17.0918	15.7964	8.91022	8.23492	0.675297
622	11	41.3	134	34.3	32.9208	23	69	1	4	14.1659	13.5963	7.88923	7.57201	0.31722
623	11	65.5	150	33.1	36.7388	29.11	86	1	4	21.6805	24.0639	9.63578	10.6951	-1.0593
624	9	51.4	141.5	33.6	35.8058	25.67	79	1	4	17.2704	18.4042	8.6256	9.19186	-0.566255
625	9	52.6	140	35.6	36.1376	26.63	79	1	4	18.7256	19.0084	9.55388	9.69815	-0.144273
626	9	51.1	142	31.7	35.1919	25.34	72	1	4	16.1987	17.9831	8.03348	8.9184	-0.884926
627	10	39.5	132	28.1	32.9208	22.66	76	1	4	11.0995	13.0037	6.37024	7.46311	-1.09287
628	10	49.1	140	38.3	35.1919	25.05	72	1	4	18.8053	17.2792	9.59454	8.81593	0.778609
629	11	66.9	155.3	36.1	30.4058	20.81	83	1	4	24.1509	20.3415	10.0136	8.43413	1.57947
630	10	55.8	140	36.1	36.4802	28.46	87	1	4	20.1438	20.356	10.2774	10.3857	-0.108254
631	11	35.3	140	24.6	24.4694	18	72	1	4	8.6838	8.63771	4.43051	4.407	0.0235147
632	10	55.1	130	39.5	39.4888	32.6	88	1	4	21.7645	21.7583	12.8784	12.8747	0.00365705
633	9	37.9	128	31.6	32.9208	23.13	71	1	4	11.9764	12.477	7.30981	7.61535	-0.305537
634	9	41.5	131.5	36.3	35.1919	23.99	72	1	4	15.0645	14.6046	8.71171	8.44577	0.265933
635	11	42.9	133.5	33.1	35.1919	24.07	75	1	4	14.1999	15.0973	7.96751	8.47106	-0.503544
636	11	40.5	136	33.6	33.6541	23.6	73	1	4	13.608	13.6299	7.35727	7.36912	-0.0118491
637	11	61.6	145	36.1	37.4532	29.29	78	1	4	22.2376	23.0712	10.5767	10.9732	-0.396474
638	10	66.8	150.5	36.3	36.7388	29.49	88	1	4	24.2484	24.5415	10.7056	10.835	-0.129414
639	11	61.5	151	37.6	35.7658	26.97	91	1	4	23.124	21.996	10.1417	9.64694	0.494721
640	11	64.1	152	34.1	35.7658	27.74	91	1	4	21.8581	22.9259	9.46074	9.92291	-0.46217
641	9	43	130.3	39.7	35.1919	25.32	80	1	4	17.071	15.1325	10.0547	8.91297	1.14175
642	11	53.6	142	42.8	36.1376	26.6	82	1	4	22.9408	19.3698	11.3771	9.60611	1.771
643	10	36.5	128	34.2	32.9208	21.9	72	1	4	12.483	12.0161	7.61902	7.33405	0.284973
644	10	37.6	126.5	33.8	33.6541	23.49	69	1	4	12.7088	12.6539	7.94188	7.9076	0.0342785
645	9	47.3	134.3	33.9	35.8058	26.22	79	1	4	16.0347	16.9361	8.89014	9.38993	-0.499783
646	9	65.8	146.5	39.3	39.482	30.8	95	1	4	25.8594	25.9791	12.0488	12.1046	-0.0557948
647	10	62.4	144	40.6	37.4532	30	91	1	4	25.3344	23.3708	12.2176	11.2706	0.946946
648	11	55.2	143	34.2	36.1376	26.99	86	1	4	18.8784	19.948	9.23194	9.75498	-0.523034
649	10	85.9	162.5	42.7	40.5262	32.5	91	1	4	36.6793	34.812	13.8904	13.1832	0.707139
650	11	63.3	153.5	37.2	35.7658	26.9	69	1	4	23.5476	22.6398	9.99378	9.60849	0.38529
651	10	69.9	141	47.9	40.8207	32.6	98	1	4	33.4821	28.5336	16.8413	14.3522	2.48904
652	11	63.7	142	40.1	38.1501	31.59	89	1	4	25.5437	24.3016	12.668	12.052	0.615988
653	9	33.6	125	33.1	30.1379	21.5	61	1	4	11.1216	10.1263	7.11782	6.48086	0.636964
654	9	61.6	145	36.1	37.4532	29.29	86	1	4	22.2376	23.0712	10.5767	10.9732	-0.396474
655	10	55.6	140	38.1	36.4802	28.36	79	1	4	21.1836	20.283	10.808	10.3485	0.459481
656	9	43.1	129	36.1	35.5202	25.89	68	1	4	15.5591	15.3092	9.34986	9.19968	0.150175
657	9	43.3	130	36.1	35.8058	25.62	72	1	4	15.6313	15.5039	9.24929	9.17391	0.0753837
658	9	45.6	135	39.1	35.1919	25.02	70	1	4	17.8296	16.0475	9.78305	8.80522	0.977827
659	10	45.1	133.5	36	35.1919	25.3	76	1	4	16.236	15.8716	9.10996	8.90547	0.204491
660	10	37.7	125	35.1	34.9063	24.12	68	1	4	13.2327	13.1597	8.46893	8.42219	0.0467359
661	10	51.9	137.5	34.1	36.1376	27.45	74	1	4	17.6979	18.7554	9.36087	9.92022	-0.559345
662	11	65.3	150	36.4	36.7388	29.02	81	1	4	23.7692	23.9904	10.5641	10.6624	-0.0983303
663	11	66.3	145	38.1	38.1501	31.53	80.5	1	4	25.2603	25.2935	12.0144	12.0302	-0.0158028
664	9	46.5	133.5	32.3	35.8058	26.09	73	1	4	15.0195	16.6497	8.42739	9.34208	-0.914692
665	11	55.1	143	31.6	36.1376	26.94	89	1	4	17.4116	19.9118	8.51465	9.7373	-1.22266
667	10	51.1	144	26.6	30.5545	20.7	95.2	1	4	13.5926	15.6133	6.55507	7.52958	-0.97451
668	9	47.4	135	39	35.8058	26	80	1	4	18.486	16.9719	10.1432	9.31245	0.830761
669	10	40	131.5	33.3	32.9208	23.13	73	1	4	13.32	13.1683	7.70287	7.61516	0.0877106
670	11	57.6	147	34.5	36.1376	26.7	80	1	4	19.872	20.8153	9.19617	9.63268	-0.43651
671	11	56.7	145	33.1	36.1376	27	82	1	4	18.7677	20.49	8.92637	9.74555	-0.819175
672	10	47.3	136	33.9	35.8058	25.57	79	1	4	16.0347	16.9361	8.66928	9.15665	-0.487366
673	9	49.6	141.5	33.2	35.1919	24.6	84	1	4	16.4672	17.4552	8.22445	8.71789	-0.493444
674	10	50.9	144.5	35.6	35.1919	24.3	75	1	4	18.1204	17.9127	8.67825	8.57877	0.099481
675	9	47.3	136	39.1	35.8058	25.6	75	1	4	18.4943	16.9361	9.99908	9.15665	0.842435
676	9	41.6	134	34.2	33.6541	23.16	72	1	4	14.2272	14.0001	7.92337	7.7969	0.12647
677	11	59.2	147	33.3	36.1376	27.39	79	1	4	19.7136	21.3935	9.12287	9.90025	-0.777387
678	9	36	137	25.9	26.1939	19.1	62	1	4	9.324	9.4298	4.96777	5.02414	-0.0563701
679	10	55.1	141.5	36.3	36.4802	27.51	71	1	4	20.0013	20.1006	9.98954	10.0391	-0.049603
680	11	58.2	147	34	35.8058	26	87	1	4	19.788	20.839	9.1573	9.64365	-0.486354
681	11	53.3	132	34.5	38.1501	30.6	80	1	4	18.3885	20.334	10.5535	11.6701	-1.11657
682	11	55.4	147	33.1	35.8058	25.63	78	1	4	18.3374	19.8364	8.486	9.17969	-0.693693
683	10	54.9	148	37	34.8201	25	83	1	4	20.313	19.1163	9.27365	8.72729	0.546357
684	11	69.1	151	33.5	36.7388	30.3	73	1	4	23.1485	25.3865	10.1524	11.1339	-0.981544
685	9	44.8	135.4	32.9	35.1919	24.43	73	1	4	14.7392	15.766	8.03964	8.5997	-0.560064
686	9	46.8	132.4	33.6	36.1376	26.69	77	1	4	15.7248	16.9124	8.97035	9.64782	-0.677473
687	11	48.5	133.5	37.4	36.1376	27	77	1	4	18.139	17.5267	10.1777	9.83419	0.343541
688	10	33.7	125	29	30.492	21.56	66	1	4	9.773	10.2758	6.25472	6.57652	-0.321796
689	11	54.4	143.5	35.9	36.1376	26.41	84	1	4	19.5296	19.6589	9.48396	9.54672	-0.0627669
690	11	49.6	130.5	35.7	37.4532	29.12	79	1	4	17.7072	18.5768	10.3975	10.9081	-0.510621
691	9	44	135.5	35.9	35.1919	23.96	73	1	4	15.796	15.4844	8.60337	8.43368	0.169693
692	10	50.3	143	38	35.1919	24.5	74	1	4	19.114	17.7015	9.34716	8.65643	0.690728
693	10	67.8	145	37.5	39.4888	32.24	83	1	4	25.425	26.7734	12.0927	12.7341	-0.641329
694	11	32.3	124.5	33.82	30.2689	20.7	65	1	4	10.9239	9.77685	7.04754	6.30754	0.739996
695	9	50.2	140	33.8	35.8058	25.51	78	1	4	16.9676	17.9745	8.65694	9.17066	-0.513725
696	9	57.8	136	43.1	38.1501	31.3	86	1	4	24.9118	22.0508	13.4687	11.9219	1.54684
697	9	35.7	127	35.7	32.9208	22.13	73	1	4	12.7449	11.7527	7.90185	7.28671	0.615145
698	10	68.6	146	45.4	40.8207	32.2	95	1	4	31.1444	28.003	14.6108	13.1371	1.47374
699	11	68.9	157	36.5	37.0977	27.95	97	1	4	25.1485	25.5603	10.2026	10.3697	-0.167073
700	11	59.6	144	36.3	36.1376	26.33	78	1	4	21.6348	21.538	10.4334	10.3868	0.0466792
701	9	60	151	36.9	35.7658	26.31	89	1	4	22.14	21.4595	9.7101	9.41165	0.298452
702	10	64.9	155	36.9	35.7658	27.01	89	1	4	23.9481	23.212	9.96799	9.66161	0.306379
703	10	34.7	126	35.2	32.9208	21.85	73	1	4	12.2144	11.4235	7.69363	7.19547	0.498158
704	9	44.5	133	33.1	35.1919	25.15	81	1	4	14.7295	15.6604	8.32693	8.85319	-0.526259
705	11	71.6	148	40.4	40.1062	32.7	107	1	4	28.9264	28.7161	13.206	13.11	0.0960241
706	11	64.2	156	38.7	35.7658	26.3	79	1	4	24.8454	22.9617	10.2093	9.43527	0.774053
707	9	58.9	151	36.4	35.434	25.83	77	1	4	21.4396	20.8706	9.40292	9.15339	0.249535
708	9	55.8	146.5	39.9	35.8058	25.99	83	1	4	22.2642	19.9796	10.3737	9.30919	1.06446
709	9	61.2	142	45.2	39.482	30.4	97	1	4	27.6624	24.163	13.7187	11.9832	1.73548
710	11	47.8	134	38.2	36.1376	26.6	80	1	4	18.2596	17.2738	10.1691	9.62005	0.549025
711	9	35.2	126	32.5	32.9208	22.17	72	1	4	11.44	11.5881	7.20585	7.29915	-0.0933039
712	11	39.7	130.5	32.2	33.6541	23.31	69	1	4	12.7834	13.3607	7.50629	7.84527	-0.338975
713	10	59.6	147.5	34.2	36.1376	27.39	90	1	4	20.3832	21.538	9.36889	9.89969	-0.530793
714	11	54.1	143	34.2	36.1376	26.5	81	1	4	18.5022	19.5504	9.04797	9.56058	-0.512611
715	9	47.7	130	38.2	36.4802	28	84	1	4	18.2214	17.4011	10.7819	10.2965	0.485398
716	9	60.8	152	34.2	35.7658	26.31	82	1	4	20.7936	21.7456	9	9.41206	-0.412061
717	10	59.4	138	39.8	39.482	31.2	95	1	4	23.6412	23.4523	12.414	12.3148	0.0991908
718	11	72	151.4	36.9	38.7676	31.41	105	1	4	26.568	27.9127	11.5906	12.1773	-0.586622
719	11	59.5	149	33.4	35.7658	26.8	78	1	4	19.873	21.2807	8.9514	9.58546	-0.634057
720	11	69	149.5	33.4	37.4357	30.6	85	1	4	23.046	25.8306	10.3113	11.5572	-1.24591
721	9	37.4	124.5	34.8	34.9063	24.12	68	1	4	13.0152	13.055	8.39677	8.42242	-0.0256488
722	10	55.8	148.5	33.9	34.8201	25.3	78	1	4	18.9162	19.4296	8.5779	8.81073	-0.232829
723	11	63.9	150	37.1	37.0977	28.4	95	1	4	23.7069	23.7054	10.5364	10.5357	0.00065162
724	11	51.4	134.5	36.3	36.4802	28.41	73	1	4	18.6582	18.7508	10.314	10.3652	-0.0512139
725	10	49.3	140	31.4	35.8058	26	70	1	4	15.4802	17.6522	7.89806	9.00625	-1.10819
726	10	59.8	153.5	33.9	34.8201	25.37	76	1	4	20.2722	20.8224	8.60368	8.83721	-0.233529
727	9	44.3	130.5	33.6	35.8058	26.01	69	1	4	14.8848	15.862	8.74021	9.31399	-0.573779
728	11	44.9	135.5	36.1	35.1919	24.45	79	1	4	16.2089	15.8012	8.82826	8.60618	0.222074
729	9	56.9	137.4	39.9	37.4532	30.13	89	1	4	22.7031	21.3109	12.0257	11.2883	0.73745
730	10	55.7	137.4	39.7	37.4532	29.5	79	1	4	22.1129	20.8614	11.7131	11.0502	0.662889
731	9	51.5	142	39	35.8058	25.5	77	1	4	20.085	18.44	9.96082	9.145	0.815823
732	9	36.3	127	33.9	32.9208	22	72	1	4	12.3057	11.9503	7.62955	7.40917	0.220374
733	11	58.4	151	30.8	35.434	25.61	92	1	4	17.9872	20.6935	7.88878	9.07568	-1.18691
734	9	56.8	145	36	37.4695	27	95	1	4	20.448	21.2827	9.72556	10.1225	-0.396984
735	10	58.4	143	36	35.1571	28.6		1	4	21.024	20.5317	10.2812	10.0405	0.240723
736	9	71	157	40.4	36.7388	28.8	91	1	4	28.684	26.0846	11.637	10.5824	1.05458
737	11	45	123	40.4	35.8058	25.4	70	1	4	18.18	16.1126	12.0167	10.6501	1.36651
738	9	55.5	140.5	37.6	36.4802	28.11	87	1	4	20.868	20.2465	10.5713	10.2565	0.31482
739	11	57.5	147	43.6	36.1376	26.6	81	1	4	25.07	20.7791	11.6016	9.61595	1.98569
740	9	39	133	30.9	32.2811	22.04	64	1	4	12.051	12.5896	6.81271	7.11722	-0.304507
741	10	36.3	128	33.1	32.9208	22.1	69	1	4	12.0153	11.9503	7.33356	7.29386	0.0396983
742	9	42.1	130	31.3	37.4532	29.91	72	1	4	13.1773	15.7678	7.79722	9.33006	-1.53285
743	11	54.6	139.5	39.3	35.1571	28.25		1	4	21.4578	19.1958	11.0265	9.86409	1.16238
744	10	46.1	139	33.1	32.6736	23.8	64	1	4	15.2591	15.0625	7.89768	7.79594	0.101735
745	10	53.9	135.5	37.4	37.4532	29.35	86	1	4	20.1586	20.1873	10.9795	10.9951	-0.0156257
746	10	52.1	136.5	37.1	35.1571	27.96		1	4	19.3291	18.3168	10.374	9.83072	0.54328
747	10	62.6	153	37.9	35.7658	26.74	78	1	4	23.7254	22.3894	10.1352	9.56445	0.570716
748	11	67.2	149.5	35.1	36.7388	30.2	76	1	4	23.5872	24.6885	10.5534	11.0462	-0.492737
749	11	48.2	135	42.8	36.1376	26.4	72	1	4	20.6296	17.4183	11.3194	9.55738	1.76202
750	10	44.4	132.5	35.2	35.1919	25.29	71	1	4	15.6288	15.6252	8.90213	8.90008	0.0020465
751	11	60.1	145.5	41.1	36.4802	28.38	83	1	4	24.7011	21.9246	11.6678	10.3563	1.3115
752	10	51.8	141.5	37.1	35.8058	25.87	72	1	4	19.2178	18.5474	9.59822	9.26339	0.334831
753	10	48.9	141	36.3	35.1919	24.59	75	1	4	17.7507	17.2088	8.92847	8.65592	0.27255
754	9	63.9	150	34.4	35.7658	28.4	93	1	4	21.9816	22.8544	9.7696	10.1575	-0.387896
755	10	45.1	138	34.3	33.6541	23.7	77	1	4	15.4693	15.178	8.12293	7.96997	0.152959
756	10	62	145	36.8	37.4532	29.4	83	1	4	22.816	23.221	10.8518	11.0445	-0.192628
757	11	59.7	146	31.9	36.4802	28	89	1	4	19.0443	21.7787	8.93427	10.2171	-1.2828
758	9	43.3	140	32.6	32.9208	22	80	1	4	14.1158	14.2547	7.20194	7.27281	-0.0708754
759	10	45.1	136	32.1	35.1919	24.38	71	1	4	14.4771	15.8716	7.82715	8.58107	-0.75392
760	9	41.5	126	42.3	37.4532	29.1	82	1	4	17.5545	15.5431	11.0573	9.79031	1.26695
761	11	48.7	135.5	35.4	36.1376	26.3	72	1	4	17.2398	17.599	9.38974	9.58539	-0.195645
762	9	59.5	150	38.9	35.7658	26.4	86	1	4	23.1455	21.2807	10.2869	9.45808	0.828814
763	11	56.5	145	35.3	36.1376	27	77	1	4	19.9445	20.4177	9.48609	9.71117	-0.225085
764	10	49.3	136	33.1	36.1376	26.65	70	1	4	16.3183	17.8158	8.82261	9.63226	-0.809653
765	11	58	150	32.8	35.434	25.77	78	1	4	19.024	20.5517	8.45511	9.1341	-0.67899
766	9	39.4	132.5	30.6	32.2811	22.44	64	1	4	12.0564	12.7188	6.8673	7.24458	-0.377283
767	11	59.7	147	42	36.4802	27.6	83	1	4	25.074	21.7787	11.6035	10.0785	1.52496
768	9	49	137.5	35.1	35.8058	25.7	84	1	4	17.199	17.5448	9.09699	9.27991	-0.182919
769	11	41.6	132	37.8	35.1919	23.9	70	1	4	15.7248	14.6398	9.02479	8.40211	0.622685
770	10	53.9	136.5	36.1	37.4532	28.92	76	1	4	19.4579	20.1873	10.4431	10.8346	-0.391466
771	11	47.6	137	22.8	35.1919	25.3	74	1	4	10.8528	16.7513	5.7823	8.92501	-3.14271
772	10	48.8	134.5	36.8	36.1376	26.97	78	1	4	17.9584	17.6351	9.92712	9.74843	0.17869
773	10	46	130	51.4	37.4532	29.6	70	1	4	23.644	17.2285	13.9905	10.1944	3.79616
774	11	59.9	146	35.9	36.4802	28.1	91	1	4	21.5041	21.8517	10.0882	10.2513	-0.163055
775	9	51.6	138	33.4	36.1376	27.09	78	1	4	17.2344	18.647	9.04978	9.79153	-0.741755
776	11	58.8	148.5	39.9	35.7658	26.66	74	1	4	23.4612	21.0303	10.6389	9.53658	1.10233
777	10	60.2	150	36.6	35.7658	26.66	79	1	4	22.0332	21.531	9.79253	9.56935	0.223186
778	10	59.7	146	37.8	35.1571	28	60	1	4	22.5666	20.9888	10.5867	9.84649	0.740201
779	10	47.3	133.5	36.1	36.1376	26.53	74	1	4	17.0753	17.0931	9.58089	9.59087	-0.00997739
780	9	50	138	36.3	36.1376	26.25	86	1	4	18.15	18.0688	9.53056	9.48792	0.0426397
781	11	69.7	148.5	36.8	37.4357	31.6	78	1	4	25.6496	26.0927	11.6313	11.8322	-0.200923
782	10	99.1	133	33.1	36.4802	27.75	75	1	4	32.8021	36.1519	18.5438	20.4375	-1.89373
783	11	62.1	144.5	34.3	37.4532	29.74	83	1	4	21.3003	23.2585	10.2012	11.139	-0.937802
784	9	50	130	33.9	37.1676	29.58	68	1	4	16.95	18.5838	10.0296	10.9963	-0.966751
785	10	54.2	147	32.8	35.1919	25	80	1	4	17.7776	19.074	8.22694	8.82688	-0.599942
786	11	56.3	143	40.8	36.4802	27.5	80	1	4	22.9704	20.5384	11.233	10.0437	1.18931
787	11	54.2	142	33.6	35.8058	26	89	1	4	18.2112	19.4067	9.03154	9.62445	-0.592904
788	10	48.6	139	30.4	35.1919	25.15	72	1	4	14.7744	17.1033	7.64681	8.85216	-1.20536
789	11	55.5	140	41	36.4802	28.31	83	1	4	22.755	20.2465	11.6097	10.3299	1.27983
790	11	50.9	141.5	39.9	35.8058	25.6	76	1	4	20.3091	18.2251	10.1433	9.10244	1.04082
791	9	46.3	130.5	37.1	36.1376	27.18	71	1	4	17.1773	16.7317	10.0863	9.8247	0.261649
792	11	63.9	149	43.9	38.0707	28.8	96	1	4	28.0521	24.3272	12.6355	10.9577	1.67782
793	9	35.9	126.5	33.9	32.6352	22.43	68	1	4	12.1701	11.716	7.60524	7.3215	0.283746
794	11	52	144	35.8	35.1919	25	76	1	4	18.616	18.2998	8.97762	8.82513	0.152492
795	9	49	142	36.7	35.1919	24.4	76	1	4	17.983	17.244	8.91837	8.55189	0.366477
796	9	40.1	132	36.2	32.9208	23	75	1	4	14.5162	13.2012	8.33115	7.57647	0.754678
797	11	43.9	135.5	39.6	35.1919	23.91	76	1	4	17.3844	15.4492	9.4685	8.41451	1.05399
798	10	46.9	140	37.6	35.1919	23.9	90	1	4	17.6344	16.505	8.99714	8.42092	0.576222
799	11	51.9	142.5	34.7	35.8058	25.5	73	1	4	18.0093	18.5832	8.86885	9.15147	-0.282622
800	9	55.4	137.5	38.1	37.4532	29.3	79	1	4	21.1074	20.7491	11.1642	10.9747	0.189521
801	9	37	125	25.9	32.9208	23	74	1	4	9.583	12.1807	6.13312	7.79565	-1.66253
802	11	50.5	142	33.7	35.1919	25	83	1	4	17.0185	17.7719	8.44004	8.81368	-0.373643
803	10	43.6	136	35.1	33.6541	23.57	81	1	4	15.3036	14.6732	8.27401	7.93317	0.340834
804	10	61.3	148	26.3	35.7658	27.98	79	1	4	16.1219	21.9245	7.36025	10.0093	-2.64908
805	11	70	150	36	38.0707	29	102	1	4	25.2	26.6495	11.2	11.8442	-0.644213
806	11	59.7	152	34.9	35.434	25.83	76	1	4	20.8353	21.1541	9.01805	9.15604	-0.137988
807	9	64.3	146	37.5	37.4532	30.16	87	1	4	24.1125	24.0824	11.3119	11.2978	0.0141093
808	9	52.9	145	35.2	35.1919	25.1	76	1	4	18.6208	18.6165	8.8565	8.85447	0.00203602
809	9	47.7	133	33.9	35.4979	26.96		1	4	16.1703	16.9325	9.14144	9.57233	-0.43089
810	10	52.1	135	35.2	36.4802	28.58	77	1	4	18.3392	19.0062	10.0627	10.4286	-0.365986
811	10	65	145	36	38.7851	30	98	1	4	23.4	25.2103	11.1296	11.9906	-0.86103
812	9	49.1	135	36.1	36.1376	26.94	71	1	4	17.7251	17.7436	9.72571	9.73583	-0.0101282
813	9	43.1	132	36.1	35.1919	24.73	78	1	4	15.5591	15.1677	8.92969	8.70507	0.224626
814	11	44.4	133	37.6	35.1919	25.1	75	1	4	16.6944	15.6252	9.43773	8.83329	0.604439
815	11	65.1	150	31.1	36.7388	28.93	86	1	4	20.2461	23.917	8.99827	10.6298	-1.6315
816	10	43.5	136.5	32.9	33.6541	23.2	83	1	4	14.3115	14.6395	7.68104	7.8571	-0.17606
817	9	45.8	138	36.8	35.1919	24	73	1	4	16.8544	16.1179	8.85024	8.4635	0.386739
818	9	44.7	134	40	35.1919	24.9	81	1	4	17.88	15.7308	9.95767	8.76074	1.19694
819	11	53.4	145	38.9	35.8058	25.39	72	1	4	20.7726	19.1203	9.87995	9.09407	0.785881
820	10	39.3	126	33.3	35.1919	24.75	69	1	4	13.0869	13.8304	8.2432	8.71153	-0.468329
821	9	38.2	131	36.9	36.4802	28.2	76	1	4	14.0958	13.9355	8.21386	8.12042	0.093436
822	9	60.1	146	38	36.4802	28.14	74	1	4	22.838	21.9246	10.714	10.2855	0.428491
823	9	39.1	133.5	35.5	32.9208	21.9	70	1	4	13.8805	12.872	7.7883	7.22246	0.565843
824	10	36.9	130	31.6	30.492	21.6	66	1	4	11.6604	11.2515	6.89964	6.65772	0.241923
825	10	44.5	133.5	40.4	35.1919	25.2	78	1	4	17.978	15.6604	10.0874	8.78699	1.3004
826	10	66.5	147	34	37.4532	30	82	1	4	22.61	24.9064	10.4632	11.5259	-1.0627
827	9	42.8	133	35.9	35.1919	24.2	86	1	4	15.3652	15.0621	8.6863	8.51497	0.171329
828	9	34	140	20.6	21.8236	17.6	61	2	2	7.004	7.42003	3.57347	3.78573	-0.212261
829	10	31.9	133.5	28.2	24.3297	18	66	2	2	8.9958	7.76119	5.04751	4.35477	0.692737
830	9	31.5	135.3	20	20.5934	17	65	2	2	6.3	6.48692	3.44148	3.54359	-0.10211
831	9	39	143	24.2	25.4512	19.2	74	2	2	9.438	9.92598	4.61538	4.85402	-0.238634
832	10	35.8	142	20.3	21.8236	17.6	64	2	2	7.2674	7.81286	3.60415	3.87466	-0.27051
833	11	44.1	148.5	23	24.4386	19.94	69	2	2	10.143	10.7774	4.59953	4.88723	-0.287695
834	9	25.1	125	21.9	19.6552	16	62	2	2	5.4969	4.93346	3.51802	3.15741	0.360602
835	10	35.1	138	21	23.3353	18.43	62	2	2	7.371	8.19068	3.87051	4.30093	-0.430415
836	10	40.8	141.5	29.8	29.2149	20.4	60	2	2	12.1584	11.9197	6.07244	5.95322	0.11922
837	11	29.4	138	14.1	12.5256	15.4	58	2	2	4.1454	3.68253	2.17675	1.93369	0.243054
838	10	23.7	127	12.4	12.3666	14.7	58	2	2	2.9388	2.93089	1.82206	1.81716	0.00490233
839	11	41.2	147.5	24.4	21.9048	18.9	64	2	2	10.0528	9.02479	4.62065	4.14814	0.472513
840	11	35	139	21	23.0374	18.2	67	2	2	7.35	8.0631	3.80415	4.17323	-0.369079
841	10	42.2	146.8	26.8	25.659	19.6	77	2	2	11.3096	10.8281	5.24802	5.02458	0.223438
842	9	25	132	7.3	9.46394	14.34	66	2	2	1.825	2.36598	1.04741	1.35789	-0.310482
843	10	37.6	140	27.1	24.5287	19.18	66	2	2	10.1896	9.22281	5.19878	4.70551	0.493261
844	10	47.2	130	39.2	35.8049	28	81	2	2	18.5024	16.8999	10.9482	9.99996	0.948207
845	11	36	151	11.3	12.9289	15.78	65	2	2	4.068	4.65441	1.78413	2.04132	-0.257186
846	10	31.1	142.5	11.2	11.9239	15.1	64	2	2	3.4832	3.70832	1.71533	1.8262	-0.110861
847	9	28.9	133	16.3	17.502	16.33	61	2	2	4.7107	5.05808	2.66307	2.85945	-0.196382
848	10	32.6	144	14.8	13.7316	15.8	61	2	2	4.8248	4.47651	2.32677	2.15881	0.167962
849	10	33.8	146	14.1	13.3859	15.9	71.6	2	2	4.7658	4.52442	2.23579	2.12255	0.113237
850	9	27	130	14.3	17.6661	15.9	60	2	2	3.861	4.76986	2.28462	2.8224	-0.537785
851	11	46.5	150	38	28.1639	20.66	71	2	2	17.67	13.0962	7.85333	5.82053	2.0328
852	11	40.1	142	26.7	25.5712	19.8	70	2	2	10.7067	10.2541	5.30981	5.08533	0.224481
853	11	35.5	139	23.3	23.0374	18.3	64	2	2	8.2715	8.17828	4.28109	4.23285	0.048246
854	11	38	151	18.8	15.7125	16.7	62	2	2	7.144	5.97075	3.1332	2.61863	0.514562
855	11	42	143.5	26.4	25.5712	20	68	2	2	11.088	10.7399	5.38455	5.21551	0.169039
856	11	37.2	147	19.4	18.7147	17.2	59	2	2	7.2168	6.96188	3.33972	3.22175	0.117971
857	10	31.6	134	22.5	22.6324	17.6	63	2	2	7.11	7.15183	3.95968	3.98298	-0.0232985
858	11	31.2	134	23.8	20.6561	17.3	67	2	2	7.4256	6.4447	4.13544	3.58916	0.546281
859	9	28	134	11.8	13.3624	15.6	60	2	2	3.304	3.74147	1.84005	2.08369	-0.243634
860	9	28	137.5	12.6	10.9942	14.9	68	2	2	3.528	3.07838	1.86605	1.62823	0.237816
861	9	31.4	139.3	17.3	16.5075	16.3	69.5	2	2	5.4322	5.18337	2.79946	2.67122	0.128233
862	10	34.3	142.5	12.6	17.1429	16.89	60	2	2	4.3218	5.88003	2.12831	2.89567	-0.767364
863	10	33.1	144	15.4	15.7207	16	61	2	2	5.0974	5.20356	2.45824	2.50943	-0.0511954
864	11	36	148	14.4	15.0771	16.43	72	2	2	5.184	5.42776	2.36669	2.47797	-0.111283
865	10	28	130	16.3	20.2906	16.5	62	2	2	4.564	5.68137	2.70059	3.36176	-0.661166
866	9	28.4	132	23.1	18.6422	16.5	68	2	2	6.5604	5.29438	3.76515	3.03856	0.726596
867	10	26.6	130	19.4	17.2092	15.7	60	2	2	5.1604	4.57764	3.05349	2.70866	0.344828
868	10	35.7	142.5	22.8	20.1452	17.4	62	2	2	8.1396	7.19183	4.00842	3.54168	0.46674
869	10	43	145	27.1	28.4617	20.45	71	2	2	11.653	12.2385	5.54245	5.82095	-0.278496
870	10	20	120	10.1	10.7559	13.88	55	2	2	2.02	2.15118	1.40278	1.49388	-0.0910995
871	11	32.6	135	32.6	23.8462	17.8	60	2	2	10.6276	7.77386	5.83133	4.26549	1.56584
872	10	38	143	26	23.3353	18.3	64	2	2	9.88	8.86741	4.83153	4.33635	0.49518
873	10	33.1	140.4	19	20.7071	17.1	75	2	2	6.289	6.85406	3.19042	3.47707	-0.286656
874	11	28.6	136	11.6	13.3344	15.4	66	2	2	3.3176	3.81363	1.79369	2.06187	-0.268182
875	10	40	143	29.1	26.7916	19.42	75.5	2	2	11.64	10.7166	5.69221	5.24066	0.45155
876	10	33	133	25.6	24.3297	18.7	64	2	2	8.448	8.02881	4.77585	4.53887	0.236976
877	9	29.9	133	20.6	20.7791	16.9	65.3	2	2	6.1594	6.21295	3.48205	3.51232	-0.0302737
878	9	25.4	132	5.9	9.46394	14.57	67	2	2	1.4986	2.40384	0.860078	1.37961	-0.519536
879	11	40.6	154.5	12.9	18.7649	18.07	66	2	2	5.2374	7.61853	2.19411	3.19164	-0.997532
880	9	26.1	124	23.1	22.8636	17.2	59	2	2	6.0291	5.96741	3.92111	3.88099	0.0401236
881	10	42	148	26	23.3962	19.17	67	2	2	10.92	9.82639	4.98539	4.48611	0.499276
882	9	38.1	143	29.2	23.3353	18.63	64	2	2	11.1252	8.89074	5.44046	4.34776	1.0927
883	10	39.6	144	24.2	23.7419	19.1	70	2	2	9.5832	9.4018	4.62153	4.53405	0.0874804
884	10	29.9	138	8.9	14.0615	15.7	66	2	2	2.6611	4.20439	1.39734	2.20772	-0.810382
885	10	33.6	133	26.8	24.3297	19	71	2	2	9.0048	8.17479	5.09062	4.6214	0.469223
886	9	37	138	26.2	26.7916	19.6	74	2	2	9.694	9.91288	5.09032	5.20525	-0.114933
887	10	37.6	139	29.5	26.7916	19.96	76	2	2	11.092	10.0736	5.7409	5.21382	0.527081
888	11	32.8	136.5	26.6	23.8462	17.7	63	2	2	8.7248	7.82155	4.68263	4.19786	0.484778
889	10	28.9	130	26	22.9323	17	64	2	2	7.514	6.62744	4.44615	3.92156	0.524593
890	9	42	142	27.9	30.1374	20.8	76	2	2	11.718	12.6577	5.81135	6.27739	-0.466038
891	11	48	151	26.8	28.1639	21.1	73	2	2	12.864	13.5187	5.64186	5.92897	-0.287115
892	10	34.6	150	9.2	11.393	15.3	63	2	2	3.1832	3.94198	1.41476	1.75199	-0.337236
893	10	40.7	142	25.1	25.8691	20.18	69	2	2	10.2157	10.5287	5.06631	5.22154	-0.155233
894	11	32.4	134	22.6	23.8462	18	71	2	2	7.3224	7.72616	4.07797	4.30283	-0.224863
895	10	29.5	138	10.6	12.5256	15.49	60	2	2	3.127	3.69505	1.64199	1.94027	-0.298284
896	10	48.1	150	31.3	29.6968	21.37	68	2	2	15.0553	14.2841	6.69124	6.34851	0.342734
897	11	30.4	137	16	17.0185	16.19	73	2	2	4.864	5.17361	2.59151	2.75647	-0.164959
898	10	38.1	141	28.9	25.4512	19.1	74	2	2	11.0109	9.69692	5.5384	4.87748	0.660922
899	9	30.9	141	13.2	13.227	15.1	87	2	2	4.0788	4.08714	2.05161	2.0558	-0.00419644
900	10	25	129	9.3	12.3666	15.02	61	2	2	2.325	3.09166	1.39715	1.85786	-0.460705
901	9	22.8	127	8.4	10.1488	14.1	58	2	2	1.9152	2.31392	1.18743	1.43463	-0.247206
902	11	33.7	144	13.1	15.4229	16.25	64	2	2	4.4147	5.19751	2.129	2.50651	-0.37751
903	10	36.8	139	24.7	24.5287	19.1	69	2	2	9.0896	9.02658	4.70452	4.6719	0.0326178
904	10	40.6	145	25.9	24.3186	19.3	75	2	2	10.5154	9.87337	5.00138	4.69601	0.305365
905	11	23.5	128.5	11.1	11.1124	14.5	58	2	2	2.6085	2.61141	1.57974	1.5815	-0.00176035
906	9	25.4	133	9.7	9.73994	14.2	62	2	2	2.4638	2.47395	1.39284	1.39858	-0.00573524
907	9	30	132.6	21.6	21.1396	17.2	73	2	2	6.48	6.34189	3.68543	3.60688	0.0785488
908	10	34	147	10.8	13.3859	15.8	60	2	2	3.672	4.5512	1.69929	2.10616	-0.406866
909	10	37.4	140.3	25.1	24.5287	19.1	67	2	2	9.3874	9.17375	4.76903	4.66049	0.108539
910	11	28	130	20	19.9928	16.6	71	2	2	5.6	5.59797	3.31361	3.31241	0.00120071
911	10	31	136	18.8	17.9517	16.8	65	2	2	5.828	5.56503	3.15095	3.00877	0.142177
912	10	42	146	28.5	28.4617	21.1	71	2	2	11.97	11.9539	5.6155	5.60796	0.00754357
913	9	25.9	132.5	11.9	10.9942	14.75	60	2	2	3.0821	2.8475	1.75556	1.62193	0.133627
914	10	26	130	15.5	15.2116	15.3	61	2	2	4.03	3.95501	2.38462	2.34024	0.0443736
915	9	22.6	126.5	11.3	11.1124	14.4	55	2	2	2.5538	2.5114	1.5959	1.5694	0.0264991
916	9	27.5	129.5	19.5	20.2906	16.5	58.5	2	2	5.3625	5.57992	3.19763	3.32727	-0.129645
917	11	36	146	15.6	15.7125	16.88	61	2	2	5.616	5.6565	2.63464	2.65364	-0.0189984
918	11	33.1	140	15.5	16.8451	16.88	70	2	2	5.1305	5.57572	2.6176	2.84476	-0.227155
919	9	31	138	17.6	17.1429	16.6	66	2	2	5.456	5.31431	2.86494	2.79054	0.0744002
920	9	32.4	133.5	24.4	24.3297	18.2	64	2	2	7.9056	7.88283	4.4358	4.42303	0.0127735
921	11	29.8	135.3	18	17.0185	16.4	67	2	2	5.364	5.0715	2.93017	2.77039	0.159783
922	9	31	132	24.8	24.8345	18.3	71	2	2	7.688	7.6987	4.4123	4.41845	-0.00614025
923	9	27.5	126.5	22.8	22.8636	17.2	66	2	2	6.27	6.2875	3.9182	3.92913	-0.0109339
924	11	35.6	146	17.1	15.7125	16.7	70	2	2	6.0876	5.59365	2.85588	2.62415	0.231729
925	9	25.6	132	11.2	10.7182	14.6	58	2	2	2.8672	2.74386	1.64555	1.57476	0.0707874
926	9	26.7	132.2	11	13.5631	15.27	61	2	2	2.937	3.62136	1.68051	2.07209	-0.39158
927	10	42.4	146	27.1	25.659	19.8	76	2	2	11.4904	10.8794	5.3905	5.10387	0.286638
928	11	34	138.5	12.6	12.5256	15.4	64	2	2	4.284	4.2587	2.23331	2.22013	0.0131867
929	10	29	129	23.1	22.8636	17.4	66	2	2	6.699	6.63045	4.0256	3.98441	0.0411928
930	9	29.6	138.5	13.6	12.5256	15.4	62	2	2	4.0256	3.70758	2.09861	1.93282	0.16579
931	9	25.9	133	10	9.73994	14.53	59.5	2	2	2.59	2.52264	1.46419	1.42611	0.0380775
932	10	38.9	140.5	26.1	25.8691	19.7	71.3	2	2	10.1529	10.0631	5.14325	5.09774	0.0455064
933	9	30.8	138.3	17.1	16.5075	16.2	64	2	2	5.2668	5.08433	2.75361	2.65821	0.0954023
934	11	43.1	153	22	22.8273	18.6	77	2	2	9.482	9.83857	4.05058	4.2029	-0.152323
935	9	30.8	138	16.1	16.5075	16.2	61.5	2	2	4.9588	5.08433	2.60386	2.66978	-0.0659132
936	11	36	144.5	19.8	19.983	17.3	74.5	2	2	7.128	7.19387	3.41375	3.4453	-0.0315474
937	11	43.3	147	8.1	24.4386	20.03	70	2	2	3.5073	10.5819	1.62307	4.897	-3.27392
938	10	30.5	141	14.2	12.5256	15.3	69	2	2	4.331	3.82031	2.17846	1.92159	0.256874
939	9	37	144	21.9	22.5485	17.9	70	2	2	8.103	8.34293	3.9077	4.0234	-0.115705
940	9	26	130	17	15.2116	15.3	61	2	2	4.42	3.95501	2.61538	2.34024	0.275143
941	9	36.2	141	23.4	23.3353	18.2	71	2	2	8.4708	8.44737	4.26075	4.24897	0.0117848
942	10	48.5	155	23	25.4728	20.1	77.5	2	2	11.155	12.3543	4.64308	5.14228	-0.4992
943	11	47	154	25.2	25.7405	20.2	81	2	2	11.844	12.098	4.9941	5.10121	-0.107112
944	9	33	135.8	23.1	24.144	17.8	70	2	2	7.623	7.96753	4.13358	4.3204	-0.186824
945	9	36	139.5	25.7	24.2578	19	78	2	2	9.252	8.7328	4.75431	4.4875	0.266802
946	10	24.1	125.6	18	17.2092	15.7	66	2	2	4.338	4.14741	2.74986	2.62904	0.120814
947	11	29.6	145.5	20.1	21.9048	18.7	69	2	2	5.9496	6.48383	2.81036	3.06271	-0.252349
948	9	25	122	25.7	24.7546	17.5	62	2	2	6.425	6.18866	4.31672	4.15793	0.158791
949	9	28	129.5	21.2	22.8636	17.2	60	2	2	5.936	6.40181	3.5396	3.81736	-0.277763
950	9	27.6	137	10.7	10.9942	14.7	62.5	2	2	2.9532	3.0344	1.57345	1.61671	-0.0432638
951	11	30.5	141	10	13.4481	15.4	76	2	2	3.05	4.10167	1.53413	2.06311	-0.528982
952	11	35.3	145.6	10.5	15.7125	16.63	68	2	2	3.7065	5.54651	1.7484	2.61636	-0.867955
953	9	27.1	131	21.1	18.4679	15.79	74	2	2	5.7181	5.0048	3.33203	2.91638	0.41565
954	10	42.4	146	27.7	24.7365	19.9	70	2	2	11.7448	10.4883	5.50985	4.92037	0.589479
955	11	37.2	148.5	14.4	15.0771	16.39	62.5	2	2	5.3568	5.60868	2.42914	2.54336	-0.11422
956	11	36.9	147.4	20	19.6372	17.3	82	2	2	7.38	7.24613	3.39673	3.33512	0.0616148
957	11	48.1	151.2	28.9	30.5583	21.03	91	2	2	13.9009	14.6985	6.0805	6.4294	-0.348904
958	9	33.7	135	25.1	24.4782	18.5	75	2	2	8.4587	8.24915	4.64126	4.52628	0.114981
959	9	35	141.6	22.3	24.2578	17.9	76	2	2	7.805	8.49022	3.89266	4.2344	-0.341745
960	10	29.8	141	9.5	10.4059	14.83	60.5	2	2	2.831	3.10095	1.42397	1.55975	-0.135781
961	9	28	136	15.7	13.6685	15.13	76	2	2	4.396	3.82718	2.37673	2.06919	0.307536
962	11	36.9	150.5	16.8	15.9996	16.28	76.5	2	2	6.1992	5.90385	2.73692	2.60653	0.130397
963	10	34.5	139.2	22.4	23.3353	17.8	72.4	2	2	7.728	8.05067	3.98831	4.15483	-0.166526
964	11	42.2	145	28.8	25.7405	20.07	79	2	2	12.1536	10.8625	5.78055	5.16646	0.614086
965	11	29.4	132.8	20.7	20.4812	16.9	65	2	2	6.0858	6.02149	3.45081	3.41435	0.0364681
966	10	38.2	141.3	25.9	25.4512	19.13	81	2	2	9.8938	9.72237	4.9554	4.86954	0.0858609
967	10	43	146.5	25.9	26.5099	19.89	82	2	2	11.137	11.3993	5.18911	5.31131	-0.122203
968	9	27.5	136	8.5	10.9942	14.86	63	2	2	2.3375	3.02341	1.26379	1.63463	-0.370841
969	9	33.2	135.5	23.3	24.144	18.1	72.5	2	2	7.7356	8.01582	4.21323	4.36586	-0.152625
970	9	27	128.6	24.8	19.6552	16.32	70	2	2	6.696	5.30691	4.04887	3.20893	0.839941
971	9	30.5	135	19	20.5934	17	66.5	2	2	5.795	6.28099	3.1797	3.44636	-0.266661
972	9	37.1	141.5	24.9	24.2578	18.52	76.6	2	2	9.2379	8.99963	4.61382	4.49482	0.119002
973	11	40.6	142.5	29	26.4937	19.69	78	2	2	11.774	10.7564	5.79821	5.29711	0.501105
974	10	25	125	21	19.6552	16	63	2	2	5.25	4.9138	3.36	3.14483	0.215165
975	10	25.5	131.5	10.8	10.7182	14.74	65	2	2	2.754	2.73314	1.59262	1.58056	0.0120621
976	9	28	130	22.7	20.2906	16.56	63	2	2	6.356	5.68137	3.76095	3.36176	0.399189
977	9	24.3	125	19	15.7013	15.55	66.5	2	2	4.617	3.81541	2.95488	2.44187	0.513015
978	9	28.7	129.3	20.8	22.9323	17.1	70	2	2	5.9696	6.58157	3.57066	3.9367	-0.366046
979	11	28.3	139.6	10.7	10.4059	14.6	57	2	2	3.0281	2.94486	1.55382	1.5111	0.0427144
980	10	30	131	24.6	22.8636	17.48	63.5	2	2	7.38	6.85909	4.30045	3.9969	0.303545
981	11	32.5	142.6	17.2	17.1322	16.4	74.5	2	2	5.59	5.56796	2.74899	2.73815	0.0108392
982	10	28	130	20.6	20.2906	16.7	62	2	2	5.768	5.68137	3.41302	3.36176	0.0512597
983	10	32	137	20.3	20.5934	17	64	2	2	6.496	6.58989	3.46103	3.51105	-0.0500242
984	11	41.2	145	22.9	24.4386	19.6	69	2	2	9.4348	10.0687	4.48742	4.78892	-0.301504
985	11	37.8	142.8	23.2	23.0374	18.5	73	2	2	8.7696	8.70814	4.30054	4.27041	0.0301372
986	9	30	135.3	18.7	17.9517	16.6	67.8	2	2	5.61	5.38551	3.06455	2.94192	0.12263
987	9	31	132.5	32.2	24.8345	17.62	64.4	2	2	9.982	7.6987	5.68572	4.38516	1.30056
988	10	35.8	146.5	19.3	16.0103	16.7	73	2	2	6.9094	5.73171	3.21933	2.6706	0.548728
989	11	40	143	29	26.4937	19.56	79	2	2	11.6	10.5975	5.67265	5.1824	0.490253
990	9	33.9	136	25.5	24.4782	18.32	76	2	2	8.6445	8.2981	4.67371	4.48643	0.187282
991	11	40.3	142	27.6	26.4937	19.98	81	2	2	11.1228	10.677	5.51617	5.29506	0.221105
992	10	33.5	137.9	24	22.412	17.59	71	2	2	8.04	7.50801	4.22793	3.94818	0.279752
993	10	25.2	133.6	11.1	9.73994	14.11	57	2	2	2.7972	2.45447	1.56715	1.37513	0.192019
994	10	26.2	131.2	16.5	17.2092	15.7	54	2	2	4.323	4.5088	2.51141	2.61935	-0.107942
995	10	54.1	143.1	36.5	36.5213	26.7	95	2	2	19.7465	19.758	9.64297	9.6486	-0.00562434
996	9	29.3	133	19.3	18.1374	16.56	64	2	2	5.6549	5.31426	3.19685	3.00427	0.192572
997	10	41	149.3	22.9	23.1252	18.5	75.4	2	2	9.389	9.48132	4.21211	4.25353	-0.0414175
998	10	45	137	28.8	34.4372	23.97	76	2	2	12.96	15.4967	6.905	8.25655	-1.35155
999	11	37	147	18.9	18.3542	17.1	70	2	2	6.993	6.79105	3.23615	3.1427	0.0934562
1000	11	26	129	16.8	17.2092	15.7	61	2	2	4.368	4.47439	2.62484	2.68877	-0.0639302
1001	11	24.3	128.7	12.8	12.3666	15	66	2	2	3.1104	3.00509	1.87784	1.81427	0.0635771
1002	11	28.2	138	11.7	19.6043	19	65	2	2	3.2994	5.5284	1.73251	2.90296	-1.17045
1003	11	36.5	147.5	19.4	18.3542	17	66	2	2	7.081	6.69928	3.2547	3.07924	0.175453
1004	10	39.8	142.5	26.5	26.7916	19.59	76	2	2	10.547	10.663	5.19397	5.25111	-0.0571459
1005	9	26.3	129.3	18.9	19.6552	16.2	70	2	2	4.9707	5.16932	2.97318	3.09198	-0.118804
1006	11	31.8	142	15.6	14.0615	15.77	72	2	2	4.9608	4.47156	2.46023	2.2176	0.24263
1007	10	29.9	132	22.6	23.3229	17.6	68	2	2	6.7574	6.97353	3.87821	4.00226	-0.124044
1008	9	35	137	25	24.144	18.64	72	2	2	8.75	8.45042	4.66194	4.50233	0.159617
1009	9	38	138.4	27.3	26.7916	20	77	2	2	10.374	10.1808	5.41594	5.31508	0.100867
1010	10	34.6	137.2	28.8	24.4782	18.3	74.5	2	2	9.9648	8.46945	5.29371	4.49932	0.794391
1011	11	40	145.5	23.9	22.8273	18.4	78	2	2	9.56	9.13093	4.51577	4.31309	0.202677
1012	10	36.3	146.5	17.3	18.652	16.9	69	2	2	6.2799	6.77069	2.92602	3.1547	-0.228678
1013	10	36.4	142.3	23.4	23.3353	18.5	69	2	2	8.5176	8.49404	4.20637	4.19474	0.0116344
1014	10	40	144	21	23.7419	19.4	69	2	2	8.4	9.49677	4.05093	4.57985	-0.52892
1015	10	31.5	132.3	24	24.8345	17.9	70	2	2	7.56	7.82287	4.31919	4.46937	-0.150184
1016	10	30	134	21.4	20.9539	17.2	61	2	2	6.42	6.28618	3.57541	3.50088	0.0745257
1017	10	30.9	137.6	16.4	17.0959	16.3	65.5	2	2	5.0676	5.28263	2.67649	2.79006	-0.113572
1018	11	39.4	142.5	26.7	25.1534	19.4	76.5	2	2	10.5198	9.91043	5.18057	4.88048	0.300089
1019	10	28.6	137.4	13.1	13.3344	15.2	68	2	2	3.7466	3.81363	1.98456	2.02006	-0.0355052
1020	9	39	144	19.6	23.7419	19.2	68	2	2	7.644	9.25935	3.68634	4.46535	-0.779007
1021	11	29.5	137.4	14.9	13.3624	15.6	68	2	2	4.3955	3.94191	2.32828	2.08801	0.240267
1022	10	32.3	143.4	14.5	14.0615	15.7	61	2	2	4.6835	4.54187	2.27757	2.2087	0.0688754
1023	9	28.9	134	17.5	17.3163	16.1	61	2	2	5.0575	5.00442	2.81661	2.78704	0.0295639
1024	10	38	146	21.1	22.2027	17.8	67	2	2	8.018	8.43702	3.76149	3.95807	-0.196575
1025	11	45	147	30.4	29.0863	21.1	79	2	2	13.68	13.0889	6.3307	6.05713	0.273564
1026	10	34.5	145	16.8	15.375	16.4	66	2	2	5.796	5.30436	2.75672	2.52288	0.233836
1027	11	34.4	146.5	15.3	15.0771	16	71	2	2	5.2632	5.18652	2.45231	2.41658	0.0357271
1028	9	29.6	131.8	20.9	21.2839	17	69	2	2	6.1864	6.30003	3.56129	3.6267	-0.0654111
1029	10	28	133.5	18.1	15.5129	15.8	61.5	2	2	5.068	4.34362	2.84364	2.43719	0.406448
1030	11	46	148.6	28.6	29.774	21.3	81.5	2	2	13.156	13.696	5.9578	6.20237	-0.244561
1031	10	28.4	135	11.1	13.3624	15.56	60	2	2	3.1524	3.79492	1.72971	2.08226	-0.352548
1032	9	45.1	147	28	29.3842	20.9	79	2	2	12.628	13.2523	5.84386	6.13276	-0.288896
1033	9	25.9	130	15.5	15.2116	15.3	69	2	2	4.0145	3.9398	2.37544	2.33124	0.0442029
1034	11	43.2	153	21	22.8273	18.5	80	2	2	9.072	9.8614	3.87543	4.21265	-0.337221
1035	9	36	142	23.5	24.2578	17.8	74	2	2	8.46	8.7328	4.1956	4.33088	-0.135289
1036	10	32.2	143.4	13.7	12.5536	15.6	70.5	2	2	4.4114	4.04227	2.14525	1.96574	0.179508
1037	11	37	150	13.6	15.0771	16.4	65	2	2	5.032	5.57853	2.23644	2.47935	-0.242901
1038	9	33.9	140	19.8	20.1452	17.3	64	2	2	6.7122	6.82921	3.42459	3.48429	-0.0597008
1039	10	28.7	133.5	15.3	17.502	16.1	62.5	2	2	4.3911	5.02308	2.46383	2.81843	-0.3546
1040	9	30.4	136.7	17.3	17.3163	16.2	67	2	2	5.2592	5.26416	2.81438	2.81703	-0.00265415
1041	9	26.8	132.5	13.8	13.8391	15.2	57	2	2	3.6984	3.70889	2.1066	2.11258	-0.00597539
1042	9	31.3	140	14.8	16.5075	16	62	2	2	4.6324	5.16686	2.36347	2.63615	-0.272685
1043	9	32	135	22.9	24.144	17.7	70	2	2	7.328	7.72609	4.02085	4.23928	-0.218433
1044	10	38	145.3	21.6	23.1252	18.1	77	2	2	8.208	8.78757	3.88782	4.16234	-0.274519
1045	9	28.8	133	17.7	17.502	16.3	59.5	2	2	5.0976	5.04058	2.88179	2.84956	0.0322356
1046	9	33.1	138.5	19.9	20.1452	17.3	68	2	2	6.5869	6.66805	3.43385	3.47616	-0.0423059
1047	9	23.9	132	5.2	7.31352	13.71	61	2	2	1.2428	1.74793	0.713269	1.00317	-0.289905
1048	9	29.7	139.5	13.2	12.5256	15.4	60.5	2	2	3.9204	3.7201	2.01457	1.91164	0.102926
1049	9	31.2	134	22.7	22.6324	17.5	71	2	2	7.0824	7.06131	3.94431	3.93256	0.011748
1050	9	29	135	16.3	17.3163	16.3	61	2	2	4.727	5.02173	2.59369	2.75541	-0.161718
1051	9	30.1	130	24.1	24.8345	17.9	67	2	2	7.2541	7.47519	4.29237	4.42319	-0.130821
1052	10	35.8	137	26.5	25.3375	19.1	68	2	2	9.487	9.07083	5.05461	4.83288	0.221733
1053	10	35.2	139	22.7	23.3353	18.2	68	2	2	7.9904	8.21402	4.1356	4.25134	-0.115738
1054	11	36	144.5	20.2	19.0605	17.2	64	2	2	7.272	6.86178	3.48272	3.28625	0.196465
1055	10	36.5	145	9	19.0126	17.48	73	2	2	3.285	6.93959	1.56243	3.30064	-1.73821
1056	10	34.4	145.5	16.2	15.375	16.3	70	2	2	5.5728	5.28898	2.63237	2.49831	0.134063
1057	11	40.5	144	30.2	25.7069	19.53	75	2	2	12.231	10.4113	5.89844	5.02087	0.877563
1058	10	28.5	125	14.7	17.2092	15.7	60	2	2	4.1895	4.90462	2.68128	3.13895	-0.457674
1059	10	39.8	142.5	27.3	26.7916	19.7	75	2	2	10.8654	10.663	5.35077	5.25111	0.0996531
1060	9	28.3	131.4	20.6	19.6552	16.39	61	2	2	5.8298	5.56243	3.37647	3.22161	0.154856
1061	11	47.8	152	26.8	28.1639	20.7	72	2	2	12.8104	13.4623	5.54467	5.82684	-0.282169
1062	9	30.9	135	18.1	20.5934	16.95	66	2	2	5.5929	6.36336	3.06881	3.49156	-0.422751
1063	11	44	148.5	25.4	25.3611	20	76.2	2	2	11.176	11.1589	5.06796	5.0602	0.00775926
1064	11	57.6	141.5	32.3	34.9795	28	85	2	4	18.6048	20.1482	9.29206	10.0629	-0.770848
1065	11	39	129.5	30.6	33.3543	23.1	68	2	4	11.934	13.0082	7.11617	7.7567	-0.640527
1066	11	66.5	151.4	33.1	33.6802	29.01		2	4	22.0115	22.3973	9.6028	9.77112	-0.168316
1067	11	72.2	160.5	38.8	37.9609	27.9	101.5	2	4	28.0136	27.4078	10.8747	10.6396	0.235184
1068	9	47.8	132.5	39.4	37.9792	27.3	87	2	4	18.8332	18.154	10.7273	10.3405	0.386847
1069	9	39.7	132.5	35.3	34.4539	22.61	75	2	4	14.0141	13.6782	7.9824	7.79108	0.19132
1070	11	64.3	146.4	34.1	35.8511	30	92	2	4	21.9263	23.0523	10.2302	10.7555	-0.525341
1071	11	63.6	145.5	34.1	35.2347	30.14	91	2	4	21.6876	22.4093	10.2444	10.5853	-0.340887
1072	11	73.1	155.5	33.4	34.4828	30.23	83	2	4	24.4154	25.2069	10.0972	10.4246	-0.327345
1073	9	48.5	140	31.9	33.5039	24.74	70	2	4	15.4715	16.2494	7.89362	8.29051	-0.396891
1074	11	41.6	131	41	34.7053	24.2	70	2	4	17.056	14.4374	9.93881	8.41292	1.5259
1075	9	44.6	136	31.8	34.103	24.1	73	2	4	14.1828	15.2099	7.66804	8.22337	-0.555334
1076	10	52	140	34.1	35.2774	26.53	82	2	4	17.732	18.3442	9.04694	9.35931	-0.312369
1077	10	56.9	137.7	34.1	34.8715	30	82	2	4	19.4029	19.8419	10.2329	10.4644	-0.231504
1078	11	61.3	142.3	31.6	34.5736	30.27	85	2	4	19.3708	21.1936	9.56616	10.4664	-0.900189
1079	11	64.8	146.5	32.3	32.5487	30.19		2	4	20.9304	21.0915	9.75219	9.82727	-0.0750744
1080	10	64.3	141.5	33.3	36.1154	32.11	96	2	4	21.4119	23.2222	10.6941	11.5982	-0.904132
1081	10	59.6	138.4	32.1	35.4989	31.11	90	2	4	19.1316	21.1574	9.98801	11.0456	-1.05759
1082	10	61.3	143.4	33.6	34.8715	29.81	86	2	4	20.5968	21.3762	10.0162	10.3952	-0.379023
1083	11	57.6	141.5	34.3	35.7051	28.76	86	2	4	19.7568	20.5662	9.86742	10.2716	-0.404226
1084	9	59.1	137.5	35.3	36.3358	31.25	93	2	4	20.8623	21.4744	11.0346	11.3584	-0.323777
1085	9	44.6	129.5	31.6	36.6559	26.59	86	2	4	14.0936	16.3485	8.40393	9.74853	-1.34461
1086	9	39.2	135	32.1	31.2588	21.5	71	2	4	12.5832	12.2534	6.90436	6.72342	0.180941
1087	11	67	155	27.7	34.7037	28.3	101.6	2	4	18.559	23.2515	7.72487	9.67803	-1.95316
1088	10	53.6	141	40	34.4264	26	79	2	4	21.44	18.4526	10.7842	9.28151	1.50266
1089	10	63.3	145.3	34.3	35.5326	29.98	91	2	4	21.7119	22.4921	10.2841	10.6537	-0.369554
1090	9	45	135	37.7	34.6468	25.2	80	2	4	16.965	15.5911	9.30864	8.55477	0.753869
1091	10	57.8	140.3	34.1	34.0205	29.36	79	2	4	19.7098	19.6638	10.0131	9.98971	0.0233476
1092	9	48.6	133.6	34.1	36.7417	26.74	92	2	4	16.5726	17.8565	9.28491	10.0042	-0.719295
1093	9	42.8	133	35.7	35.4738	24.1	85	2	4	15.2796	15.1828	8.63791	8.58318	0.0547263
1094	9	48.6	131.5	34.3	35.8049	28.1	76	2	4	16.6698	17.4012	9.64004	10.063	-0.422964
1095	11	59.6	145.5	31.36	34.728	28.24	84	2	4	18.6906	20.6979	8.82869	9.77689	-0.948196
1096	9	36.6	131	31.6	32.2036	21.3	76	2	4	11.5656	11.7865	6.73947	6.8682	-0.128732
1097	9	48.1	134.3	32.3	35.8785	26.66	88	2	4	15.5363	17.2575	8.61382	9.56813	-0.954311
1098	10	56.1	138.6	33.3	36.1154	29.2	93	2	4	18.6813	20.2607	9.7248	10.547	-0.822186
1099	10	45	138	34.5	35.0677	23.6	82.8	2	4	15.525	15.7805	8.15217	8.28632	-0.134148
1100	10	53.6	137	36.2	35.3724	28.55	78	2	4	19.4032	18.9596	10.3379	10.1016	0.236338
1101	11	53.5	140	35.3	34.1286	27.29	78.5	2	4	18.8855	18.2588	9.63546	9.3157	0.319755
1102	9	49.6	134.4	34.1	34.6468	27.45	77	2	4	16.9136	17.1848	9.36348	9.51364	-0.150154
1103	9	43.6	128.5	32.3	35.0032	26.4		2	4	14.0828	15.2614	8.5287	9.24246	-0.713761
1104	9	45.5	135.5	35.6	35.4978	24.78	82	2	4	16.198	16.1515	8.82232	8.79699	0.0253256
1105	11	65.2	158.5	36.9	37.2347	26	99	2	4	24.0588	24.277	9.57669	9.66355	-0.0868649
1106	9	55.6	133.5	36.3	35.9051	31.19	91	2	4	20.1828	19.9632	11.3245	11.2013	0.123211
1107	9	44.6	128.8	33.1	35.0032	26.88		2	4	14.7626	15.6114	8.89879	9.41045	-0.511657
1108	11	47.7	135.6	33.1	34.349	25.94	77	2	4	15.7887	16.3845	8.58671	8.91072	-0.324006
1109	11	73.6	148.3	37.1	37.911	33.46	93	2	4	27.3056	27.9025	12.4156	12.6871	-0.271406
1110	9	52.9	135.3	34.3	35.3724	28.89	79.5	2	4	18.1447	18.712	9.91184	10.2217	-0.309903
1111	9	42.4	130	33.8	35.2031	25	73.5	2	4	14.3312	14.9261	8.48	8.83202	-0.352025
1112	11	63.4	141.3	33.1	34.9543	31.75	88	2	4	20.9854	22.161	10.5107	11.0995	-0.588812
1113	11	77.6	146.5	40.1	40.7574	36.15	105	2	4	31.1176	31.6278	14.4988	14.7365	-0.237709
1114	10	62.6	136.6	36.3	35.4725	32.19	88	2	4	22.7238	22.2058	12.1781	11.9005	0.277602
1115	11	74.6	158.3	34.3	35.7202	29.76	95	2	4	25.5878	26.6473	10.2111	10.6339	-0.422791
1116	9	53.3	133.6	33.1	33.9068	29.86	73	2	4	17.6423	18.0723	9.88422	10.1251	-0.240914
1117	10	47.5	139.6	34.8	35.2774	24.9	83	2	4	16.53	16.7568	8.48207	8.59843	-0.116358
1118	10	64.3	143.6	33.3	33.7354	31.18	78	2	4	21.4119	21.6919	10.3836	10.5193	-0.135764
1119	10	55.8	145	32.1	34.1749	26.53	77	2	4	17.9118	19.0696	8.51929	9.06997	-0.550683
1120	10	54.8	145	39.3	34.1749	26	78	2	4	21.5364	18.7279	10.2432	8.90743	1.33581
1121	10	69.3	146.3	34.1	34.926	32.37	91	2	4	23.6313	24.2037	11.0408	11.3082	-0.26743
1122	9	60	147	37.9	35.4066	27.76	89	2	4	22.74	21.2439	10.5234	9.83106	0.692333
1123	10	55	146	35.3	35.0259	25.8	83	2	4	19.415	19.2642	9.10818	9.03746	0.070723
1124	11	58	146.5	38.4	36.257	27.8	92	2	4	22.272	21.0291	10.3773	9.79817	0.579119
1125	10	47.1	142	32.9	33.0754	23.4	81	2	4	15.4959	15.5785	7.68493	7.72591	-0.0409759
1126	11	61.5	143.6	33.1	35.2011	29.82	91	2	4	20.3565	21.6487	9.87175	10.4984	-0.62663
1127	10	55.7	136.5	34.3	35.7194	29.98	91	2	4	19.1051	19.8957	10.2538	10.6781	-0.42431
1128	11	56.5	138.5	34.3	33.7226	29.45	77	2	4	19.3795	19.0533	10.1028	9.93277	0.17006
1129	11	68.5	144.5	34.9	37.7289	32.8	99	2	4	23.9065	25.8443	11.4493	12.3774	-0.928056
1130	9	52.6	133.4	31.3	35.6582	29.55	88	2	4	16.4638	18.7562	9.25163	10.5398	-1.2882
1131	9	51.4	139	38.1	34.4264	26.6	79	2	4	19.5834	17.6952	10.1358	9.15852	0.977289
1132	9	44.7	131	34	35.8049	26	77	2	4	15.198	16.0048	8.85613	9.32627	-0.47014
1133	11	63.6	146.3	34.7	35.2347	29.71	91	2	4	22.0692	22.4093	10.3109	10.4698	-0.158882
1134	10	51.5	137.5	31.3	34.6468	27.23	81	2	4	16.1195	17.8431	8.52602	9.43768	-0.911666
1135	10	61.6	144	35.2	33.2188	24.88	72	2	4	21.6832	20.4628	10.4568	9.86825	0.58854
1136	9	40	133	30.2	34.8325	27.61	78	2	4	12.08	13.933	6.8291	7.87665	-1.04755
1137	11	69.6	144.3	38.1	35.2777	33.42	91	2	4	26.5176	24.5533	12.7351	11.7917	0.943351
1138	10	73.1	151	44.2	40.2734	32.1	83	2	4	32.3102	29.4399	14.1705	12.9116	1.25887
1139	9	46.3	134.6	31.1	34.6468	26.14	78	2	4	14.3993	16.0415	7.94788	8.8543	-0.906424
1140	9	44.6	134.5	31.6	34.6468	24.62	81	2	4	14.0936	15.4525	7.79072	8.54189	-0.751171
1141	9	52.5	138	40.6	35.9049	27.6	91	2	4	21.315	18.8501	11.1925	9.89816	1.29434
1142	10	56.4	141.5	31.3	34.4264	28.16	81	2	4	17.6532	19.4165	8.81679	9.69746	-0.88067
1143	9	37	131	32.3	32.751	22.1	75	2	4	11.951	12.1179	6.96405	7.06129	-0.0972389
1144	11	65.7	158	35.6	35.3999	26.3	95.4	2	4	23.3892	23.2578	9.36917	9.31652	0.0526512
1145	9	44	133	39.2	37.2536	25.3	91	2	4	17.248	16.3916	9.75069	9.26654	0.484156
1146	10	68.2	154.2	36.6	35.7659	28.68	91	2	4	24.9612	24.3923	10.4978	10.2585	0.23924
1147	10	58.6	137.6	33.9	34.0205	30.95	81	2	4	19.8654	19.936	10.4921	10.5293	-0.0372912
1148	9	51.6	132.5	37.4	36.25	29.2	86	2	4	19.2984	18.705	10.9923	10.6543	0.338005
1149	11	60.9	149	33.1	33.8771	27.43	81	2	4	20.1579	20.6311	9.07973	9.29289	-0.21316
1150	11	63.9	145.3	36.9	35.8511	30.26	92	2	4	23.5791	22.9089	11.1685	10.8511	0.317469
1151	11	52.5	140	31.6	34.1286	26.78	81	2	4	16.59	17.9175	8.46429	9.14158	-0.677293
1152	10	58.5	140.5	31.3	34.8715	29.63	86	2	4	18.3105	20.3998	9.27572	10.3341	-1.0584
1153	10	55.5	147	35.9	35.4066	25.68	88	2	4	19.9245	19.6506	9.22046	9.09373	0.126733
1154	11	56	146	32.9	35.1087	26.27	89	2	4	18.424	19.6609	8.64327	9.22353	-0.580257
1155	10	45.5	138	32.1	34.2167	23.89	79	2	4	14.6055	15.5686	7.66934	8.17508	-0.505732
1156	10	52.7	144	31.9	34.1413	25.41	79.5	2	4	16.8113	17.9925	8.1073	8.67693	-0.569627
1157	9	58.6	134.8	33.3	36.3358	32.24	93	2	4	19.5138	21.2928	10.739	11.718	-0.97901
1158	11	65.2	151.5	41	38.5258	28.4	99	2	4	26.732	25.1188	11.6468	10.9439	0.702844
1159	11	62.6	149.4	39.5	35.9654	28.19	93	2	4	24.727	22.5144	11.0782	10.0869	0.991307
1160	10	53.6	142	36.5	36.5213	26.6	93	2	4	19.564	19.5754	9.70244	9.7081	-0.00565902
1161	11	69	149.5	36.9	37.5078	30.87	105	2	4	25.461	25.8804	11.3918	11.5795	-0.187633
1162	9	49.3	136.2	33.5	34.6468	26.57	79	2	4	16.5155	17.0809	8.90302	9.20781	-0.304784
1163	9	45.6	134.4	38.7	35.8785	25.5	87.3	2	4	17.6472	16.3606	9.76961	9.05733	0.712282
1164	10	57.8	152	34.2	35.115	25	88	2	4	19.7676	20.2965	8.55592	8.78482	-0.228901
1165	9	41.6	133.1	36.5	35.8545	23.5	87	2	4	15.184	14.9155	8.57097	8.41939	0.151582
1166	11	60.6	149	33.3	33.4963	22.8	91	2	4	20.1798	20.2988	9.08959	9.14317	-0.0535824
1167	11	54.9	146.5	36.5	34.728	25.57	85	2	4	20.0385	19.0657	9.33663	8.88336	0.453262
1168	11	66.3	143.5	33.1	35.2011	32.19	91	2	4	21.9453	23.3383	10.6571	11.3335	-0.676479
1169	11	56.2	138.4	37.1	35.2011	29.34	91	2	4	20.8502	19.783	10.8852	10.3281	0.557145
1170	9	60	141.5	38.1	34.8715	29.7	83	2	4	22.86	20.9229	11.4173	10.4498	0.967485
1171	10	48.7	144	31.4	33.5202	23.3	87.5	2	4	15.2918	16.3244	7.37452	7.87247	-0.497951
1172	11	62.1	142.3	33.3	33.7226	30.66	81	2	4	20.6793	20.9418	10.2124	10.342	-0.129611
1173	10	59.7	147.2	40.3	36.5549	27.6	95.4	2	4	24.0591	21.8233	11.1036	10.0717	1.03186
1174	10	49.9	133.5	36.3	35.6835	27.99	86	2	4	18.1137	17.8061	10.1635	9.99092	0.172612
1175	11	56.5	150.5	34	35.9654	25.1	94	2	4	19.21	20.3205	8.48114	8.97141	-0.49027
1176	10	50.3	138	38.6	35.2774	26.9	85	2	4	19.4158	17.7445	10.1952	9.31765	0.877584
1177	11	66.9	146.3	34.3	34.3221	31.25	86	2	4	22.9467	22.9615	10.7209	10.7278	-0.00691236
1178	9	49.6	134.5	33.3	34.6468	27.41	81	2	4	16.5168	17.1848	9.13022	9.4995	-0.369276
1179	9	53.9	141.3	33.1	35.2774	26.99	83	2	4	17.8409	19.0145	8.93578	9.52359	-0.587816
1180	11	56	150	37.1	35.349	24.88	90	2	4	20.776	19.7955	9.23378	8.79798	0.435797
1181	11	66.4	145	33.1	33.4711	31.58	81	2	4	21.9784	22.2248	10.4535	10.5707	-0.117212
1182	9	40.5	131.5	33.5	33.6522	23.42	71	2	4	13.5675	13.6291	7.846	7.88164	-0.0356388
1183	9	59.9	137.4	38.1	36.3358	31.72	95	2	4	22.8219	21.7651	12.0887	11.5289	0.559768
1184	9	47	135.5	38.5	35.8785	26.1	88	2	4	18.095	16.8629	9.85553	9.18445	0.671081
1185	9	70.7	153.5	35.5	35.4352	30	89	2	4	25.0985	25.0527	10.652	10.6326	0.0194361
1186	11	57	143.8	36.7	36.2234	27.8	95.8	2	4	20.919	20.6474	10.1163	9.98497	0.131366
1187	9	40.3	135.5	32.6	32.4439	21.9	86	2	4	13.1378	13.0749	7.15557	7.1213	0.0342694
1188	10	59.6	146.5	37.6	35.9385	27.8	90.5	2	4	22.4096	21.4193	10.4414	9.98001	0.461398
1189	11	59.6	150	31.9	35.9654	26.48	92	2	4	19.0124	21.4354	8.44996	9.52685	-1.07689
1190	10	51.1	146.5	35.3	33.4635	23.8	79	2	4	18.0383	17.0999	8.40466	7.96741	0.437253
1191	10	56.6	138.8	34.1	34.8715	29.37	83	2	4	19.3006	19.7372	10.0183	10.2449	-0.226648
1192	10	43.1	138.5	33.3	33.0754	22.5	78	2	4	14.3523	14.2555	7.48207	7.43161	0.0504598
1193	11	50.4	139	37.8	35.607	26.08	91	2	4	19.0512	17.9459	9.86036	9.28831	0.572052
1194	11	67.5	156.5	33	34.7037	27.8	106	2	4	22.275	23.425	9.09471	9.56424	-0.46953
1195	11	66	162	34.3	33.3116	25.2	79	2	4	22.638	21.9856	8.62597	8.3774	0.248576
1196	9	44	137	31.6	33.2958	23.44	81	2	4	13.904	14.6502	7.40796	7.80551	-0.397553
1197	11	67.9	146	34.7	33.7155	30.44	86	2	4	23.5613	22.8928	11.0533	10.7397	0.313592
1198	9	50	137.5	36.6	36.7417	26.6	95	2	4	18.3	18.3709	9.67934	9.71681	-0.037475
1199	9	48.9	133.6	33.1	34.6468	27.39	79	2	4	16.1859	16.9423	9.06826	9.49204	-0.423779
1200	11	55	140	36.3	35.3602	28.06	87	2	4	19.965	19.4481	10.1862	9.9225	0.263721
1201	9	44.3	140	32.7	33.9264	22.6	84.5	2	4	14.4861	15.0294	7.39087	7.66806	-0.27719
1202	11	78.5	154	40.2	43.0078	33.4	114	2	4	31.557	33.7611	13.3062	14.2356	-0.929376
1203	9	72.1	153	36.3	36.3773	30.8	89	2	4	26.1723	26.228	11.1804	11.2043	-0.0238091
1204	11	69.8	148.5	31.3	34.3365	31.65	91	2	4	21.8474	23.9669	9.90711	10.8682	-0.961123
1205	9	45.6	134.6	31.6	34.6468	25.16	78	2	4	14.4096	15.799	7.95356	8.72044	-0.766873
1206	11	62.5	143.5	32.6	34.5736	30.35	85	2	4	20.375	21.6085	9.8945	10.4935	-0.599013
1207	9	48.3	134.5	34.6	34.3127	26.69	73	2	4	16.7118	16.573	9.23801	9.16131	0.0767089
1208	10	66.3	145.3	33.9	32.8465	31.4		2	4	22.4757	21.7772	10.6459	10.3151	0.330836
1209	9	48	141	33.9	35.0677	24.1	86	2	4	16.272	16.8325	8.1847	8.46663	-0.281929
1210	10	49.4	134.5	36.3	35.8785	27.3	87	2	4	17.9322	17.724	9.91263	9.79752	0.115111
1211	9	43	123	44.1	40.9584	28.4	83	2	4	18.963	17.6121	12.5342	11.6413	0.892923
1212	9	46.3	130.8	36.3	35.8049	27.06	78	2	4	16.8069	16.5777	9.82363	9.68966	0.133975
1213	11	47.5	138.4	31.8	34.9795	24.79	83	2	4	15.105	16.6153	7.88585	8.67432	-0.788469
1214	10	55.5	145	31.9	35.0259	26.39	84	2	4	17.7045	19.4394	8.42069	9.24584	-0.825149
1215	10	48	140.5	36.1	34.4264	24.31	77	2	4	17.328	16.5247	8.778	8.37106	0.406945
1216	10	68	158	34.7	35.0912	27.23	98	2	4	23.596	23.862	9.45201	9.55858	-0.106565
1217	10	72	155.5	44.6	42.6224	32.3	107	2	4	32.112	30.6881	13.2803	12.6914	0.588855
1218	9	48.9	135	36.3	34.6468	26.83	81	2	4	17.7507	16.9423	9.73975	9.29619	0.443566
1219	10	49.9	135	32.1	34.6468	27.37	76	2	4	16.0179	17.2888	8.78897	9.48629	-0.697322
1220	9	44.5	126.9	35.9	38.226	27.6	90	2	4	15.9755	17.0106	9.92045	10.5632	-0.642755
1221	9	53.6	135.5	34.3	34.2409	29.19	81	2	4	18.3848	18.3531	10.0134	9.99612	0.0172528
1222	11	67.4	150.5	29.8	33.8046	29.75	87.5	2	4	20.0852	22.7843	8.86754	10.0592	-1.19164
1223	11	68.7	151.5	31.3	33.8046	29.93	87	2	4	21.5031	23.2238	9.36862	10.1183	-0.74967
1224	10	58.6	150.5	35.7	35.6469	25.8	90	2	4	20.9202	20.8891	9.23619	9.22245	0.0137405
1225	11	61.6	141.6	33.1	33.7226	30.72	79	2	4	20.3896	20.7731	10.1691	10.3604	-0.191287
1226	9	52.6	134.5	31.9	34.2409	29.07	81	2	4	16.7794	18.0107	9.27538	9.95603	-0.680651
1227	10	88.8	144	49.4	49.16	42.8	125.5	2	4	43.8672	43.6541	21.1551	21.0523	0.102757
1228	10	50	141	38.1	36.5213	25	92	2	4	19.05	18.2606	9.58201	9.18497	0.39704
1229	10	59.6	142.2	34.1	34.8715	29.47	86	2	4	20.3236	20.7834	10.0508	10.2782	-0.227385
1230	9	42	132.5	37.7	36.4462	23.92	84	2	4	15.834	15.3074	9.01901	8.71907	0.29994
1231	10	45.1	139	31.8	33.0754	23.3	79.5	2	4	14.3418	14.917	7.42291	7.72062	-0.297715
1232	11	59.6	150.1	33.1	35.349	26.48	91	2	4	19.7276	21.068	8.75614	9.35109	-0.59495
1233	9	42.8	134	36.4	35.2881	23.8	82	2	4	15.5792	15.1033	8.67632	8.41129	0.265027
1234	10	72.4	151.5	44.2	43.4418	31.5	106.5	2	4	32.0008	31.4519	13.9423	13.7032	0.239154
1235	10	59.6	150	35.1	35.115	26.48	87	2	4	20.9196	20.9285	9.2976	9.30157	-0.0039652
1236	10	58.9	140.5	33.3	34.8715	29.83	86	2	4	19.6137	20.5393	9.93589	10.4048	-0.468885
1237	11	52.6	135.5	37.1	35.0746	28.64	79	2	4	19.5146	18.4492	10.6287	10.0485	0.580264
1238	10	48.3	138.5	38.6	35.6581	25.6	87.5	2	4	18.6438	17.2228	9.7193	8.97853	0.740769
1239	11	56.9	143.6	40.8	36.2234	27.7	93	2	4	23.2152	20.6111	11.2581	9.99523	1.26283
1240	9	50.1	137.5	39.8	35.4978	26.4	86	2	4	19.9398	17.7844	10.5467	9.40663	1.14005
1241	9	46.9	135.4	35.1	34.3127	25.58	71	2	4	16.4619	16.0927	8.9793	8.77789	0.201409
1242	10	59.6	141.6	34.3	34.0205	29.72	78	2	4	20.4428	20.2762	10.1956	10.1125	0.0830844
1243	9	44.3	132	37.1	35.8049	25.42	78	2	4	16.4353	15.8616	9.43256	9.1033	0.329266
1244	10	52.5	137.5	32.7	35.4978	27.76	86	2	4	17.1675	18.6363	9.08033	9.85724	-0.776911
1245	11	55.9	145.3	32.1	33.8771	26.47	75	2	4	17.9439	18.9373	8.49935	8.96988	-0.470528
1246	10	70	152	41.7	40.0805	30.4	102	2	4	29.19	28.0563	12.6342	12.1435	0.49068
1247	9	40.9	135	34.1	32.9617	22.4	67.5	2	4	13.9469	13.4813	7.65262	7.39717	0.255454
1248	11	63	151	37.7	35.9654	27.7	94	2	4	23.751	22.6582	10.4166	9.93738	0.479265
1249	11	62.4	142.4	33.1	34.5736	30.77	86	2	4	20.6544	21.5739	10.1857	10.6392	-0.453467
1250	11	52.9	141	36.9	34.1286	26.6	74	2	4	19.5201	18.054	9.81847	9.08104	0.737433
1251	10	53.5	144.3	37.6	36.5213	25.9	93	2	4	20.116	19.5389	9.66071	9.38355	0.277157
1252	9	49.9	134.6	34.1	34.6468	25.54	78	2	4	17.0159	17.2888	9.39215	9.54276	-0.150614
1253	10	57	131.5	48.2	44.5767	32.8	100	2	4	27.474	25.4087	15.888	14.6937	1.19432
1254	9	75	156	41.9	39.515	30.9	103	2	4	31.425	29.6362	12.913	12.1779	0.73503
1255	11	60.5	150.8	32.4	34.8171	26.88	89.5	2	4	19.602	21.0644	8.61981	9.26287	-0.643057
1256	10	54.6	147	36.3	35.4066	25.26	88	2	4	19.8198	19.332	9.17201	8.94626	0.225747
1257	9	52	134.5	43.6	37.4673	29	91.8	2	4	22.672	19.483	12.5327	10.7699	1.76283
1258	9	35.9	125	32.1	33.6522	22.97	71	2	4	11.5239	12.0811	7.3753	7.73192	-0.356626
1259	9	47.7	137.5	39.2	35.4978	25	83	2	4	18.6984	16.9325	9.89006	8.95601	0.934054
1260	9	46.1	139	35.3	35.0677	23.9	84	2	4	16.2733	16.1662	8.4226	8.36717	0.0554239
1261	11	54.6	135.6	38.1	35.1747	29.71	88	2	4	20.8026	19.2054	11.3135	10.4449	0.868655
1262	11	65	150	39.5	36.691	28.88	93	2	4	25.675	23.8492	11.4111	10.5996	0.81148
1263	11	53.4	134.5	33.6	35.1747	29.51	89	2	4	17.9424	18.7833	9.91827	10.3831	-0.464824
1264	10	62.4	145.5	39.8	38.7038	29.5	100	2	4	24.8352	24.1512	11.7312	11.4081	0.323107
1265	9	50.9	137.3	36.1	35.4978	27	84	2	4	18.3749	18.0684	9.74729	9.58469	0.162597
1266	10	66.3	147	36.1	35.0006	30.68	89	2	4	23.9343	23.2054	11.0761	10.7388	0.337304
1267	9	40.2	134.5	30.6	31.5929	22.22	75	2	4	12.3012	12.7003	6.79991	7.02055	-0.220641
1268	11	65.4	143.5	34.1	32.8001	31.75		2	4	22.3014	21.4513	10.83	10.4172	0.412829
1269	9	43.9	137	35.2	34.1468	23.4	83	2	4	15.4528	14.9904	8.23315	7.98681	0.246338
1270	10	51.6	136.5	39.1	35.8785	27.69	89	2	4	20.1756	18.5133	10.8283	9.93615	0.892169
1271	10	40	137	32.8	31.2588	21.7	72	2	4	13.12	12.5035	6.99025	6.66179	0.328465
1272	11	75.2	154.2	41.4	39.7826	31.7	101	2	4	31.1328	29.9165	13.0933	12.5818	0.511519
1273	9	40.7	134	33.6	33.2958	22.6	74	2	4	13.6752	13.5514	7.61595	7.54701	0.0689435
1274	11	68.9	157	37.4	34.177	28	90	2	4	25.7686	23.5479	10.4542	9.5533	0.900921
1275	11	50.6	142	36.7	35.3602	25.4	89	2	4	18.5702	17.8923	9.20958	8.87337	0.336214
1276	10	46	138	37.7	35.2774	24.8	83	2	4	17.342	16.2276	9.10628	8.52111	0.585171
1277	10	76	160	40.4	41.6803	29.9	107	2	4	30.704	31.6771	11.9937	12.3738	-0.380098
1278	11	51	144	36.9	34.6944	25.3	82	2	4	18.819	17.6942	9.07552	8.53307	0.542455
1279	10	48.5	142	35.2	34.2167	24.1	80	2	4	17.072	16.5951	8.46657	8.23007	0.236501
1280	9	50.6	137.4	33.4	34.5275	23.3	88.5	2	4	16.9004	17.4709	8.95207	9.25426	-0.302191
1281	10	54.4	138.5	39.1	36.003	28.35	85	2	4	21.2704	19.5856	11.0886	10.2103	0.878301
1282	10	49.6	136.5	36.9	34.6468	26.62	79	2	4	18.3024	17.1848	9.82297	9.22316	0.599805
1283	10	52.6	138.5	35.1	35.6581	27.42	89	2	4	18.4626	18.7561	9.62484	9.77786	-0.153024
1284	10	61.6	142	37.3	35.2521	30.54	88	2	4	22.9768	21.7153	11.395	10.7693	0.625617
1285	9	46.9	133.7	37.1	35.8785	26.23	88	2	4	17.3999	16.827	9.73383	9.41334	0.320491
1286	10	79.3	156.4	39.1	37.027	32.41	91	2	4	31.0063	29.3624	12.6758	12.0038	0.672061
1287	10	53.3	146	36.4	34.1749	25	81	2	4	19.4012	18.2152	9.10171	8.54534	0.556372
1288	10	65.5	143.3	45.1	42.8818	31.89	108	2	4	29.5405	28.0876	14.3855	13.678	0.707546
1289	11	54.3	146.5	34.5	34.728	27.62	83	2	4	18.7335	18.8573	8.72858	8.78628	-0.057696
1290	9	55.6	144.5	37.5	35.9049	26.6	90	2	4	20.85	19.9631	9.98551	9.56076	0.424749
1291	11	66.5	147	41.1	37.6859	30.8	99	2	4	27.3315	25.0611	12.6482	11.5975	1.05067
1292	11	115	158	48.7	46.9346	46.7	140	2	4	56.005	53.9747	22.4343	21.621	0.813274
1293	11	59.6	142.3	33.3	33.7226	29.43	77	2	4	19.8468	20.0987	9.80123	9.92563	-0.124393
1294	9	49.8	134.5	36.8	34.6468	27.52	78	2	4	18.3264	17.2541	10.1305	9.5378	0.592738
