# Supplementary material for: Fat mass prediction equations and reference ranges for Saudi Arabian Children aged 8–12 years using machine technique method
Source: PeerJ. 2021 Feb 23;9:e10734. doi: 10.7717/peerj.10734 (PMC7908871; doi:10.7717/peerj.10734)
Supplement: Supplemental Information 2 [file peerj-09-10734-s002.xlsx]

## Sheet: Sheet1
	Column1	Column2	Column3
	gender	1	female
		2	male
	Column1	Column2	Column3
	Category	2	Healthy weight
		4	Obeses
